# Supplementary material for: Patterns of care for people presenting to Australian general practice with musculoskeletal complaints based on routinely collected data: protocol for an observational cohort study using the Population Level Analysis and Reporting (POLAR) database
Source: PubMed Central journal article supplement — BMJ Open. 2021 Sep 24;11(9):e055528. doi: 10.1136/bmjopen-2021-055528 (PMC8475141; doi:10.1136/bmjopen-2021-055528), 2021-09-24
Supplement: bmjopen-2021-055528.draft_revisions.pdf [file bmjopen-2021-055528.draft_revisions.pdf]

# BMJ Open

BMJ Open is committed to open peer review. As part of this commitment we make the peer review history of every article we publish publicly available.

When an article is published we post the peer reviewers' comments and the authors' responses online. We also post the versions of the paper that were used during peer review. These are the versions that the peer review comments apply to.

The versions of the paper that follow are the versions that were submitted during the peer review process. They are not the versions of record or the final published versions. They should not be cited or distributed as the published version of this manuscript.

BMJ Open is an open access journal and the full, final, typeset and author-corrected version of record of the manuscript is available on our site with no access controls, subscription charges or pay-per-view fees (<http://bmjopen.bmj.com>).

If you have any questions on BMJ Open's open peer review process please email [info.bmjopen@bmj.com](mailto:info.bmjopen@bmj.com)

# BMJ Open

**Patterns of care for people presenting to Australian general practice with musculoskeletal complaints based upon routinely collected data: Protocol for an observational cohort study using the Population Level Analysis and Reporting (POLAR) database**

|                               |                                                                                                                                                                                                                                                                                                                                                                                                                                                                                                                                                                                                                                                                                                                                                                                                                                                                                                                                                                               |
|-------------------------------|-------------------------------------------------------------------------------------------------------------------------------------------------------------------------------------------------------------------------------------------------------------------------------------------------------------------------------------------------------------------------------------------------------------------------------------------------------------------------------------------------------------------------------------------------------------------------------------------------------------------------------------------------------------------------------------------------------------------------------------------------------------------------------------------------------------------------------------------------------------------------------------------------------------------------------------------------------------------------------|
| Journal:                      | <i>BMJ Open</i>                                                                                                                                                                                                                                                                                                                                                                                                                                                                                                                                                                                                                                                                                                                                                                                                                                                                                                                                                               |
| Manuscript ID                 | bmjopen-2021-055528                                                                                                                                                                                                                                                                                                                                                                                                                                                                                                                                                                                                                                                                                                                                                                                                                                                                                                                                                           |
| Article Type:                 | Protocol                                                                                                                                                                                                                                                                                                                                                                                                                                                                                                                                                                                                                                                                                                                                                                                                                                                                                                                                                                      |
| Date Submitted by the Author: | 16-Jul-2021                                                                                                                                                                                                                                                                                                                                                                                                                                                                                                                                                                                                                                                                                                                                                                                                                                                                                                                                                                   |
| Complete List of Authors:     | Haas, Romi; Cabrini Health, Monash-Cabrini Department of Musculoskeletal Health and Clinical Epidemiology; Monash University, Department of Epidemiology and Preventive Medicine<br>Busija, Ljoudmila; Monash University, Department of Epidemiology and Preventive Medicine<br>Gorelik, Alexandra; Cabrini Health, Monash-Cabrini Department of Musculoskeletal Health and Clinical Epidemiology; Monash University, Department of Epidemiology and Preventive Medicine<br>O'Connor, Denise; Cabrini Health, Monash-Cabrini Department of Musculoskeletal Health and Clinical Epidemiology; Monash University, Department of Epidemiology and Preventive Medicine<br>Pearce, Christopher; Outcome Health<br>Mazza, Danielle; Monash University, Department of General Practice<br>Buchbinder, Rachelle; Cabrini Health, Monash-Cabrini Department of Musculoskeletal Health and Clinical Epidemiology; Monash University, Department of Epidemiology and Preventive Medicine |
| Keywords:                     | PRIMARY CARE, Musculoskeletal disorders < ORTHOPAEDIC & TRAUMA SURGERY, Back pain < ORTHOPAEDIC & TRAUMA SURGERY, Shoulder < ORTHOPAEDIC & TRAUMA SURGERY, Knee < ORTHOPAEDIC & TRAUMA SURGERY, EPIDEMIOLOGY                                                                                                                                                                                                                                                                                                                                                                                                                                                                                                                                                                                                                                                                                                                                                                  |
|                               |                                                                                                                                                                                                                                                                                                                                                                                                                                                                                                                                                                                                                                                                                                                                                                                                                                                                                                                                                                               |

SCHOLARONE™  
Manuscripts

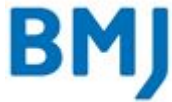

I, the Submitting Author has the right to grant and does grant on behalf of all authors of the Work (as defined in the below author licence), an exclusive licence and/or a non-exclusive licence for contributions from authors who are: i) UK Crown employees; ii) where BMJ has agreed a CC-BY licence shall apply, and/or iii) in accordance with the terms applicable for US Federal Government officers or employees acting as part of their official duties; on a worldwide, perpetual, irrevocable, royalty-free basis to BMJ Publishing Group Ltd ("BMJ") its licensees and where the relevant Journal is co-owned by BMJ to the co-owners of the Journal, to publish the Work in this journal and any other BMJ products and to exploit all rights, as set out in our [licence](#).

The Submitting Author accepts and understands that any supply made under these terms is made by BMJ to the Submitting Author unless you are acting as an employee on behalf of your employer or a postgraduate student of an affiliated institution which is paying any applicable article publishing charge ("APC") for Open Access articles. Where the Submitting Author wishes to make the Work available on an Open Access basis (and intends to pay the relevant APC), the terms of reuse of such Open Access shall be governed by a Creative Commons licence – details of these licences and which [Creative Commons](#) licence will apply to this Work are set out in our licence referred to above.

Other than as permitted in any relevant BMJ Author's Self Archiving Policies, I confirm this Work has not been accepted for publication elsewhere, is not being considered for publication elsewhere and does not duplicate material already published. I confirm all authors consent to publication of this Work and authorise the granting of this licence.

1  
2  
3 **Patterns of care for people presenting to Australian general practice with**  
4 **musculoskeletal complaints based upon routinely collected data: Protocol for an**  
5 **observational cohort study using the Population Level Analysis and Reporting**  
6 **(POLAR) database**  
7  
8  
9

10 Romi Haas ([romi.haas@monash.edu](mailto:romi.haas@monash.edu))<sup>1,2\*</sup>, Ljoudmila Busija ([lucy.busija@monash.edu](mailto:lucy.busija@monash.edu))<sup>2</sup>,  
11 Alexandra Gorelik ([Alexandra.gorelik@monash.edu](mailto:Alexandra.gorelik@monash.edu))<sup>1,2</sup>, Denise O'Connor  
12 ([denise.oconnor@monash.edu](mailto:denise.oconnor@monash.edu))<sup>1,2</sup>, Christopher Pearce ([drchrispearce@mac.com](mailto:drchrispearce@mac.com))<sup>3</sup>, Danielle  
13 Mazza ([danielle.mazza@monash.edu](mailto:danielle.mazza@monash.edu))<sup>4</sup>, Rachele Buchbinder  
14 ([rachele.buchbinder@monash.edu](mailto:rachele.buchbinder@monash.edu))<sup>1,2</sup>  
15  
16

17  
18 <sup>1</sup> Monash-Cabrini Department of Musculoskeletal Health and Clinical Epidemiology, Cabrini  
19 Health, Malvern, Victoria, Australia.

20 <sup>2</sup> Department of Epidemiology and Preventive Medicine, School of Public Health and  
21 Preventive Medicine, Monash University, Melbourne, Victoria, Australia.

22 <sup>3</sup> Outcome Health, Blackburn, Victoria, Australia.

23 <sup>4</sup> Department of General Practice, Monash University, Notting Hill, Victoria, Australia.

24 \* Corresponding author  
25  
26

## 27 Correspondence

28  
29 Romi Haas  
30 Monash-Cabrini Department of Musculoskeletal Health and Clinical Epidemiology, Cabrini  
31 Institute  
32 154 Wattletree Rd, Malvern  
33 Victoria 3144  
34 Australia  
35 Email: [romi.haas@monash.edu](mailto:romi.haas@monash.edu)  
36 Telephone: +61 3 9508 3499  
37  
38

## 39 Keywords

40 Protocol  
41 Primary care  
42 Musculoskeletal disorders  
43 Low back pain  
44 Neck pain  
45 Shoulder pain  
46 Knee pain  
47  
48

## 49 ABSTRACT

### 51 Introduction

52  
53 General practice is integral to the Australian healthcare system. Outcome Health's  
54 Population Level Analysis and Reporting (POLAR) database uses de-identified electronic  
55 health records to analyse general practice data in Australia. Previous studies using routinely  
56 collected health data for research have not consistently reported the codes and algorithms  
57 used to describe the population, exposures, interventions and outcomes in sufficient detail to  
58 allow replication. This paper reports a study protocol investigating patterns of care for people  
59  
60

1  
2  
3 presenting with musculoskeletal conditions to general practice in Victoria, Australia. Its focus  
4 is on the systematic approach used to classify and select eligible records from the POLAR  
5 database to facilitate replication. This will be useful for other researchers using routinely  
6 collected health data for research.  
7  
8

## 9 **Methods and analysis**

10  
11 This is a retrospective cohort study. Patient-related data will be obtained through electronic  
12 health records from a subset of general practices across three primary health networks (PHN)  
13 in South Eastern Victoria. Data for patients with a low back, neck, shoulder and/or knee  
14 condition and who received at least one GP face-to-face consultation between 1/01/2014 and  
15 31/12/2018 will be included. Data quality checks will be conducted to exclude patients with  
16 poor data recording and/or non-continuous follow-up. Relational data files with eligible and  
17 valid records will be merged to select the study cohort and the GP care received  
18 (consultations, imaging requests, prescriptions and referrals) between diagnosis and  
19 31/12/2018. Number and characteristics of patients and GPs, and number, type and timing of  
20 imaging requests, prescriptions for pain relief and referrals to other health providers will be  
21 investigated.  
22  
23  
24  
25

## 26 **Ethics and dissemination**

27  
28 Ethics approval was obtained from the Cabrini and Monash University Human Research Ethics  
29 Committees (Reference Numbers 02-21-01-19 and 16975 respectively). Study findings will be  
30 reported to Outcome Health, participating PHNs, disseminated in academic journals and  
31 presented in conferences.  
32  
33

## 34 **ARTICLE SUMMARY**

### 35 **Strengths and limitations of this study**

- 36  
37 • This is the first study to our knowledge to report the codes and algorithms used to classify,  
38 select and merge eligible records from the POLAR database into a patient-centred database  
39 to facilitate analysis of general practice patterns of care.  
40  
41
- 42  
43 • The systematic approach used in this study can be adapted by other researchers using  
44 routinely collected health data for research purposes.  
45  
46
- 47  
48 • This study will extend previous research that has assessed the representativeness of  
49 POLAR data to GP care across the wider Australian population.  
50  
51
- 52  
53 • These data are likely to underestimate actual allied health visits as some of these do not  
54 require a GP referral in Australia; some prescriptions for pain relief are available without a  
55 prescription so these data will also be underestimated.  
56  
57
- 58  
59 • It is possible not all patterns of care for the study cohort will be directly attributable to a  
60 musculoskeletal condition as reasons for GP consultations, referrals, and prescriptions are  
not mandated by the source Electronic Medical Records (EMRs).

## INTRODUCTION

General practice plays an essential role in providing primary health care to the population. In Australia 86% of the population visits a general practitioner (GP) multiple times a year<sup>1</sup>, and nearly 20% of these consultations are for a musculoskeletal condition<sup>2</sup>. These conditions account for 23% of the years lived with disability in Australia<sup>3</sup> and are also a major cause of disability worldwide<sup>4</sup>. Until 2016, the BEACH (Bettering the Evaluation and Care of Health) program provided the most comprehensive data on clinical activities of Australian general practice<sup>5</sup>. The program identified a number of activities that represent low-value care for people with musculoskeletal conditions including an over-reliance on imaging, prescription of opioids, and unnecessary referrals to specialist care<sup>6,7</sup>. However, in-depth exploration of these activities within the BEACH program is limited by its cross-sectional design, and these data are no longer being collected.

Technological advancements have facilitated the extraction of de-identified patient information from general practice clinical information systems. The advantage of these datasets for research purposes are that they are longitudinal and can therefore be used to establish sequences of events at the patient level and to examine changes in GP management over time. Both the Medicine Insight<sup>8</sup> and the Population Level Analysis and Reporting (POLAR) databases<sup>9</sup> are examples of longitudinal general practice datasets within Australia. Unlike POLAR, the Medicine Insight program does not currently include referrals provided by GPs to other healthcare providers<sup>8</sup>. These data may provide important insights into how well GPs are playing their role as gatekeepers of the Australian healthcare system.

While using routinely collected data for research purposes offers considerable opportunities to improve health care, there are several challenges to be overcome. Differences in patient information management and data extraction tools result in variability in both the information captured and ways in which this information is coded. In particular, the way in which text values (diagnoses, examination findings, test results and medications) are transformed to codes can be a source of variation within and between studies. Previous studies have highlighted how code selection affects the reported prevalence and precision of results<sup>10</sup>. Studies conducted using routinely collected health data should therefore be reported with sufficient detail and clarity to allow replication. However, a systematic evaluation of a random sample of 124 publications using routinely collected health data has demonstrated inadequate reporting of the methods used<sup>11</sup>. For example, in 44 studies where definitions of codes or classification algorithms were deemed necessary to describe the population, exposures or interventions and outcomes, only nine (20.5%) reported all three items adequately. The REporting of studies Conducted using Observational Routinely collected Data (RECORD) guidelines, published in 2015, were developed to assist in this process and to ensure that readers can assess the internal and external validity of the findings of these studies<sup>12</sup>.

The POLAR database draws data from every consultation occurring for millions of patients in approximately 30% of general practices across South-Eastern Victoria<sup>13</sup>, an area that comprises more than half of Victoria's population<sup>14</sup>. Inclusion is based on practice consent so this volume is increasing exponentially as more practices consent to add their data and as more consultations occur over time. Unlike in other countries, coding is not embedded in the clinical process and needs to be conducted specifically for research purposes. Data are provided to research users in a relational database that organises data into files that can be merged based on common data fields. Identifying and selecting relevant records and merging separate files

1  
2  
3 into a patient-centred database for analysis is a complex task that could potentially yield  
4 variable results depending on the methods used.  
5

6  
7 Previous studies have used the POLAR database to investigate patterns of antimicrobial  
8 prescribing for children<sup>15</sup>, to examine characteristics of patients presenting to an after-hours  
9 clinic<sup>16</sup>, to estimate GP recording of cardiovascular risk factors<sup>17</sup>, and to describe  
10 characteristics of pathology test ordering in general practice<sup>18</sup>. However, these studies have not  
11 reported the methods used to classify and select eligible records or the processes used to merge  
12 data files into a patient-centred database for analysis.  
13

14  
15 This manuscript presents a protocol for a study investigating patterns of GP care for people  
16 with a low back, neck, shoulder and/or knee condition in Victoria, Australia. It describes the  
17 methods used to classify and select eligible records from the POLAR database and how  
18 relational data files will be merged into a patient-centred database. This systematic approach  
19 will guide future research by enabling researchers interested in using routinely collected health  
20 data, and the POLAR database in particular, to answer other clinically relevant questions about  
21 general practice care. Study findings will advance existing knowledge about GP care for people  
22 with these musculoskeletal conditions and whether it conforms to best evidence-based practice.  
23 Differences in care across different musculoskeletal complaints may also inform tailored  
24 interventions to improve care and ultimately reduce the burden of disease associated with these  
25 musculoskeletal complaints.  
26  
27  
28  
29

## 30 **Objectives**

31 The aim of this study will be to examine GP patterns of care for people with low back, neck,  
32 shoulder and knee conditions. Specific objectives will be to:

- 33 1. Describe and compare the management (number, type and timing of imaging tests and  
34 procedure requests, prescriptions for pain relief, and referrals to other health providers)  
35 provided by GPs to people with low back, neck, shoulder and knee conditions
- 36 2. Describe the prevalence of comorbidities among specific musculoskeletal diagnoses within  
37 this cohort
- 38 3. Examine the association between management types and patient- and practice-related  
39 variables
- 40 4. Examine the longitudinal changes in GP management for these conditions between 2014  
41 and 2018 inclusive  
42  
43  
44

## 45 **METHODS**

### 46 **Study design**

47 A retrospective cohort study using general practice health records from Victoria, Australia.  
48  
49

### 50 **Data source**

51 This study will use data from Outcome Health's POLAR database<sup>9</sup>. The database structure is  
52 based on eight relational files, each containing de-identified practice, provider, and/or patient  
53 codes (Figure 1). These common fields allow merging of the data files so that databases can be  
54 configured for specific research purposes. Data is extracted from two different clinical  
55 information systems, covering ninety percent of included general practices. All data is  
56 extracted using the Hummingbird data extraction tool<sup>9</sup>.  
57  
58  
59  
60



## Setting

The POLAR database contains de-identified patient-related data from all electronic medical records of consenting general practices within the PHNs of Eastern Melbourne, South Eastern Melbourne and Gippsland within Victoria, Australia. Our study will include data collected over five calendar years from 1 January 2014 until 31 December 2018 relating to all patients with an eligible musculoskeletal condition and who received at least one face-to-face GP consultation. Follow up will be from the time of the initial recorded diagnosis to 31<sup>st</sup> December 2018. Data analyses will be completed by the end of 2021.

## Participants

The study cohort will include people diagnosed during 2014 to 2018 inclusive with a low back, neck, shoulder and/or knee condition, limited to age 45 years and over except for low back which will be limited to age 18 years and over. The differing age restrictions were chosen because the prevalence of most musculoskeletal conditions increases markedly after the age of 45 except for low back pain which increases after the age of 18<sup>19</sup>. Eligibility criteria are presented (Table 1). We excluded traumatic diagnoses and conditions typically primarily managed by a specialist (e.g., inflammatory and autoimmune rheumatic diseases). Patients with an eligible diagnosis and age will also have received at least one GP face-to-face consultation during the study dates. The musculoskeletal diagnosis will not have to occur during a GP consultation since it is an eligible diagnosis that could result from consultation with other health care providers.

## Variables

Preparatory work to classify and select eligible records has been completed as part of the protocol process. In circumstances where Outcome Health has previously coded data (e.g., diagnosis records), we used this coding to select eligible records that fitted our inclusion criteria. In circumstances where there was no coding (e.g., imaging tests), we coded the data into categories and then selected eligible records. Outcome Health's approach to coding used clinical natural language processing to automatically code structured narrative text within the electronic medical record following by a manual process for quality checking and correction<sup>20</sup>. For example, this allowed the free text items 'back pain', 'low back pain', and 'lumbar pain' to all sit under the same diagnostic code. Where possible, coding was conducted using a standardised classification system. For example, diagnoses are coded using SNOMED CT-AU terminology<sup>21</sup> and prescriptions are coded according to the Anatomical Therapeutic Chemical (ATC) classification system<sup>22</sup>. In cases where there is no standardised classification system available (e.g., providers and referrals), Outcome Health used a similar process to code these variables into relevant categories (e.g., type of health care provider). Clinical natural language processing conducted by Outcome Health has previously demonstrated accurate coding of over 95% of the narrative text to SNOMED CT-AU terms in a sample of approximately 57,000 diagnosis records<sup>20</sup>. Our approaches to coding and/or selecting eligible records for each variable are described in detail below.

### Provider records

Healthcare providers other than a GP may be nested within a general practice. To limit all diagnoses, consultations, referrals, and prescriptions to those made only by GPs we used coding within the provider type field conducted by Outcome Health. This is coded by Outcome Health



1  
2  
3 according to the professional background of the healthcare provider delivering the service (e.g.,  
4 GP, nurse).  
5

### 6 Diagnoses records

7  
8  
9 All SNOMED CT-AU diagnosis-related terms used during 2014-2018 were searched by two  
10 study authors (RH and RB) to select eligible low back, neck, shoulder and knee conditions. We  
11 included all patients with an eligible musculoskeletal diagnosis during 2014-2018 regardless  
12 of whether they had a prior musculoskeletal diagnosis. Included SNOMED diagnosis terms are  
13 presented (Table 2). Sacral conditions were included as part of low back conditions. The  
14 following SNOMED terms were excluded as these conditions were deemed to be indicative of  
15 traumatic injury or conditions that are not managed primarily by GPs: fracture (except lumbar  
16 and tibial plateau fractures), dislocation, synovectomies/synovitis, and cauda equina syndrome.  
17 Knee ligamentous and meniscal tears were included as these are likely due to degeneration in  
18 the 45 years and over age group<sup>23</sup>. Lesions were excluded as these could involve a wound, ulcer  
19 or tumour and are not musculoskeletal conditions. General musculoskeletal terms such as  
20 sprain or osteoarthritis (where the site was not specified) were also excluded as these could not  
21 be attributed to a specific body region. We included relevant surgical or procedural  
22 musculoskeletal terms as GPs are involved in referral and follow-up for these conditions.  
23  
24  
25  
26

27 Using experienced clinicians, Outcome Health has further categorised SNOMED diagnoses  
28 into overarching groups and utilised key chronic disease groups as a qualifier<sup>9</sup>. For example,  
29 free text such as 'low back pain' or 'angina' could be qualified as a chronic disease if present  
30 for six months or more. We used these chronic disease groups to identify eligible comorbid  
31 diagnoses for our study cohort as follows: chronic cardiovascular disease, chronic obstructive  
32 pulmonary disease, chronic musculoskeletal conditions, cancer, opioid addiction, dementia,  
33 diabetes, depression/anxiety, and obesity. Obesity was identified using SNOMED terms as it  
34 was not coded as a chronic disease category in the POLAR database. We included previous  
35 chronic musculoskeletal conditions so that these could be investigated as a potential predictor  
36 of different management patterns.  
37  
38

### 39 Activity records

40  
41 Activity records are coded in POLAR according to the type of consultation provided (e.g.,  
42 telehealth, visit, telephone). Each time a note is recorded in the narrative section it is coded by  
43 the EMR and this is extracted by POLAR. We used this coding to select eligible patients who  
44 had at least one 'Activity type' relating to a face-to-face consultation (i.e., encounter, surgery  
45 or visit) during 2014-2018 inclusive. Telehealth and telephone consultations were also included  
46 for follow-up consultations only.  
47  
48

### 49 Referral records

50  
51 Referral records are coded in POLAR according to discipline (e.g., neurosurgeon,  
52 physiotherapist, endocrinologist). We used this coding to select eligible referral groups  
53 considered relevant to a person with low back, neck, shoulder or knee conditions. The  
54 following referral groups were included: orthopaedics and neurosurgery (surgical specialists);  
55 sports medicine, rheumatology, rehabilitation medicine, neurology, and pain management  
56 (non-surgical specialists); and physiotherapy, osteopathy, massage therapy, exercise  
57 physiology, chiropractor, and psychology (allied health providers).  
58  
59  
60

## Prescription records

Medications are coded in POLAR according to the Anatomic and Therapeutic Classifications (ATC) system<sup>22</sup>. We included medications deemed by the study authors to be commonly prescribed for pain relief to people with musculoskeletal conditions. Medications within the following categories were included: simple analgesics; non-steroidal anti-inflammatories (NSAIDs); chondroitin and/or glucosamine; topical products for joint and muscular pain; opioids; neuromodulators and any relevant combinations. We included neuromodulators such as gabapentin and pregabalin because these are being increasingly used for the management of musculoskeletal conditions such as nonspecific low back pain or sciatica despite evidence of a lack of effectiveness and a higher risk of adverse events<sup>24</sup>. Opioid analgesics were further categorised into (i) weak single ingredient opioid analgesics (e.g. codeine), defined as <50 morphine milligram equivalents (MME) per day; (ii) strong single ingredient opioid analgesics (e.g. tapentadol, oxycodone, morphine), defined as 150 MME per day; and (iii) combination opioid analgesics<sup>25</sup>. Medicines in the combination opioid category were categorised based on the strongest medicine present, either as a weak combination opioid or as a strong combination opioid.

To ensure we included all potentially eligible medication names, we searched by both ATC category and by medication name from the prescription file during 2014-2018. The medication names we included are presented in Table 3. We included oral, topical and injectable preparations of medications. We excluded the following prescriptions: aspirin, decongestants (e.g., pseudoephedrine), antihistamines (e.g., doxylamine), opioid cough suppressants (e.g., dextromethorphan), and expectorants (e.g., guaifenesin). These were excluded on the basis that they were likely to have been prescribed for another condition (e.g., aspirin for secondary prevention of cardiovascular disease<sup>26</sup>).

## Imaging records

The test data file within POLAR contains radiology and pathology tests requested by the GP. At the time of data extract, coding of the test data file had not been completed for specific imaging tests by Outcome Health and there were too many records to scan manually. We therefore exported all radiology test names during 2014-2018 inclusive and used an inductive coding process to select the following eligible imaging tests: plain radiographs, CT and MRI scans of the lumbar and cervical spine; plain radiographs, CT, MRI and ultrasounds of the knee; and plain radiographs, MRI scans and ultrasounds of the shoulder. We also included lumbar spine, knee, shoulder and cervical spine injections and shoulder hydrodilatation as eligible radiology procedures.

To code eligible imaging records, we first used the string match command in Stata to select all test names for each eligible anatomical region (i.e., low back, neck, shoulder and knee). Within each region, we then iteratively coded all imaging records into subgroups according to the type of imaging test (e.g., ultrasound). This process involved developing string match terms to identify each type of eligible radiology test or procedure within the sample, reviewing the uncoded test names (subgrouped as 'other') and manually coding additional terms until the remaining test names could not be classified into any further subgroups. We also developed string match terms to identify bilateral tests of the shoulder and knee. The initial string match terms used to code each body region and eligible imaging test or procedure are presented in Appendix 1.

1  
2  
3 During the coding process, there were numerous test names that did not definitively identify a  
4 type of imaging test (e.g., 'right knee'). We labelled these as 'unspecified'. We plan to classify  
5 these as plain radiographs in our analysis. This is because plain radiograph was deemed to be  
6 the default radiology modality in the Electronic Medical Record (EMR) software. The  
7 subgroups of imaging records inductively developed for each eligible body region are  
8 presented in Table 4. Our subgroup coding (excluding test names labelled as 'unspecified' and  
9 'other') accounted for 96%, 95.8%, 95.2% and 96.6% of the identified low back (n=180,630),  
10 neck (n=192,844), shoulder (n=236,803) and knee (n=235,123) imaging test names  
11 respectively.  
12  
13  
14

15 Test names indicating more than one imaging test were classified separately. We excluded  
16 imaging tests of soft tissues of the neck and test names indicating a combined neck image with  
17 the head, larynx, thyroid and/or abdomen (unless it specifically stated cervical spine) as we  
18 deemed these investigations were most likely not requested for a musculoskeletal condition.  
19 We also excluded test names with the following terms as these were not deemed to indicate an  
20 imaging test or procedure: 'report', 'findings', 'cancel', 'results', 'letter'.  
21  
22  
23

### 24 **Data access and cleaning**

25 Outcome Health provided the research team with access to all POLAR database records since  
26 inception (1997). Data quality checks will be performed to label data as 'acceptable' for  
27 analysis using a similar process to that conducted by an established general practice database  
28 in the United Kingdom<sup>27</sup>. Duplicate data and records with empty or implausible birth dates  
29 (defined as greater than 115 years of age at time of diagnosis or dated after patient  
30 management) will be excluded from analyses. We will exclude practices without any activity  
31 data during 2014-2018. We will also examine the consistency of activity, test, prescription,  
32 and referral data for each practice in each eligible calendar year. If a gap in reporting from  
33 any practice is identified for one year or more, only data from the earliest date after which  
34 there was no gap will be included. For example, if a practice has activity data in 2014, 2017  
35 and 2018, only data from 2017 onwards will be included. In addition, we will exclude activity  
36 records that represent more than one face-to-face consultation with a GP for the same patient  
37 on the same day. This is because an 'activity' occurs in POLAR anytime a patient record is  
38 accessed regardless of whether this was for clinical or administration purposes.  
39  
40  
41  
42  
43  
44

### 45 **Approach to dataset creation**

46 We will use a systematic process to systematically exclude ineligible records in order to  
47 merge data and select the study cohort (Figure 2). This process will require the merging of  
48 five relational data files (patient, practice, provider, activity and diagnosis) in a specific  
49 sequence to ensure all relevant records are retained. For example, we will not limit diagnosis  
50 records to 2014-2018 until after we have selected relevant comorbidities. A patient-centred  
51 database will be prepared to examine the number and type of GP consultations, imaging test  
52 and procedure requests, prescriptions for pain relief, and referrals to other health providers  
53 for our study cohort. Data that does not match our eligibility criteria (including data with  
54 missing fields) will be excluded during the merging process as unmatched records. Duplicate  
55 records, records with implausible dates or missing fields, and multiple records of the same  
56 type on a single day will also be removed and reported.  
57  
58  
59  
60

## Analyses

All relevant data will be extracted from the POLAR SQL database and imported into Stata 15 (STATA Corp LP, College Station, TX, USA) for data management and analyses. The methods in this protocol are structured according to RECORD guidelines (Appendix 2)<sup>12</sup>. Full lists of codes used to define eligible variables are available from <https://clinicalcodes.rss.mhs.man.ac.uk/medcodes/article/174/><sup>28</sup> where there is a recognised coding system.

Descriptive statistics will be used to summarise the study cohort including the number and type of eligible musculoskeletal conditions, patient demographics and comorbidities. These will be compared to national health survey data to assess the representativeness of the POLAR database to the wider Australian population. Eligible musculoskeletal conditions will be grouped according to body region.

Primary analysis will include analysis of each management type provided for each participant during the first year after their index diagnosis. A sensitivity analysis will be conducted including the entire follow-up period until 31<sup>st</sup> December 2018. For prescriptions, the primary analysis will include the entire follow-up period because repeated prescriptions over more than one year are anticipated. Descriptive statistics will also be used to summarise the number and type of GP all-cause consultations, imaging tests and procedures requested, prescriptions for pain relief, and referrals to other health providers for the study cohort. Results will be stratified by affected body region. Consultations will be categorised as face-to-face or telecommunication. Imaging requests will be categorised according to the type of imaging modality or procedure and body region (e.g., knee MRI). Bilateral knee and shoulder imaging requests will be counted as two imaging requests. Prescriptions will be categorised according to paracetamol, NSAIDs, glucosamine and/or chondroitin, opioids (weak single opioid, strong single opioid, weak combination opioid, and strong combination opioid) and neuromodulators. Referrals will be categorised according to surgical specialist, non-surgical specialist, and allied health. Patterns and timing of management (imaging requests, prescriptions and referrals) for people with eligible low back, neck, shoulder and knee conditions will be examined and compared between each year within the five-year study period and relative to time of diagnosis using trend analyses.

One of the limitations of the POLAR database is that it does not capture reasons for the clinical encounter or management types (imaging request, prescription or referral). To account for the subsequent uncertainty in attributing management types to a particular diagnosis for those with multiple musculoskeletal conditions, participants with eligible musculoskeletal diagnoses from multiple body regions will be analysed separately to those with eligible diagnoses in one body region. For participants with multiple eligible musculoskeletal diagnoses throughout the study period, the primary analysis will be conducted relative to the date of the first (index) eligible musculoskeletal diagnosis and a sensitivity analysis relative to the date of the most recent diagnosis will also be conducted. Imaging requests will be analysed relative to the date of the most recent musculoskeletal diagnosis for the same body region. For example, a shoulder ultrasound will be analysed

1  
2  
3 relative to the index date of an eligible shoulder diagnosis even if the same patient was  
4 diagnosed previously with an eligible knee condition.  
5  
6

7 The association between management types and patient- and practice-related characteristics  
8 will be examined using regression analysis. Predictors will include patient age, gender, body  
9 region(s) affected by eligible musculoskeletal conditions, socioeconomic status, remote or  
10 metropolitan location of GP practice, whether the patient lives within the Primary Health  
11 Network (PHN) of the practice, and time since diagnosis. Socioeconomic status will be  
12 defined by the Index of Relative Socioeconomic Advantage and Disadvantage (IRSAD)  
13 using 2016 Census data<sup>29</sup>.  
14  
15

16  
17 Sequence analysis will be used to categorise sequences of management types of people with  
18 eligible musculoskeletal conditions into similar groups based on observed characteristics<sup>30</sup>.  
19 This will take into account both the time since diagnosis and sequence of each management  
20 type. We will use this to identify the most frequently used combinations and sequences of  
21 management and the patient- and practice-related variables that correlate with each  
22 management combination.  
23  
24

### 25 **Sample size consideration**

26  
27 Sequence analysis will require the largest sample size of our planned analyses and will  
28 therefore form the basis of our sample size consideration. We plan to examine the following  
29 six management types: non-surgical referrals, surgical referrals, allied health referrals, opioid  
30 prescription, X-ray and/or ultrasound requests, and MRI and/or CT scan requests. This  
31 provides a total of 720 potential sequence combinations. Based on a recommended 20 to 30  
32 subjects per subgroup<sup>31</sup>, we estimate a sample size of between 14,400 and 21,600 will be  
33 required to differentiate between each sequence combination or pattern of care. Recent use of  
34 the POLAR database using data from approximately 200 general practices identified 20,514  
35 active adult patients with type 2 diabetes before July 2016<sup>32</sup>. Our extract is based on 301  
36 general practices from 2014 to 2018 and since the prevalence of diabetes is less than that of  
37 musculoskeletal conditions<sup>33</sup>, we expect a sample size of more than 20,000.  
38  
39  
40  
41  
42

### 43 **Patient and public involvement**

44  
45 There will be no involvement of patients or the public in this study.  
46  
47

## 48 **DISCUSSION**

49  
50 Explicitly reporting our systematic approach used to classify, select and merge eligible records  
51 from relational data files into a patient-centred database for analysis promotes transparency,  
52 reproducibility and completeness of the reporting of research conducted using routinely  
53 collected health data. The approach used to code eligible imaging tests from structured  
54 narrative text coded over 95% of the 845,400 cumulative imaging-related test and procedure  
55 records identified for low back, shoulder, knee and neck conditions during 2014-2018. Our  
56 code lists are available for all variables that have been previously coded by POLAR and those  
57 with a recognised coding system have been made available on the ClinicalCodes online  
58 repository. Although our coding process may only be applicable to systems that do not embed  
59  
60



coding in the clinical process, this approach can also be adapted to examine patterns of care over time for other conditions in general practice.

The main strength of this study is that it will facilitate an overview of the care provided by GPs to the same patient(s) over time and thereby enable temporal sequences to be examined. The POLAR database contains all patient-related activity within each practice making it representative of the included practices. Previous research has demonstrated comparable prevalence and age-gender distribution of people diagnosed with type 2 diabetes within the POLAR database to those within Australia<sup>32</sup>. This study will add to these findings by assessing the representativeness of people with musculoskeletal conditions within the POLAR database to the wider Australian population.

Constraints within the POLAR database may potentially limit the reliability of this study's findings although these are problems inherent in the use of any extracted data. Variability in workflows and recording behaviour introduces potential biases and the different clinical information systems used by the practices within POLAR may result in variability in the information entered. The objective of POLAR is to remove as much variability as possible by using and being transparent about the coding process. High accuracy of diagnostic coding by Outcome Health has been previously demonstrated<sup>20</sup>. In addition, it is possible not all patterns of care for the study cohort will be directly attributable to a musculoskeletal condition because reasons for GP consultations, referrals, and prescriptions are not mandated in the source EMRs. Prescriptions for some types of pain relief and referrals to allied health providers may also be underestimated by the POLAR database as these forms of management may be generated outside of general practice. These data are also likely to underestimate actual allied health visits and prescriptions for pain relief as some of these do not require a GP referral and are available over-the-counter without a prescription respectively in Australia.

## ETHICS AND DISSEMINATION

Prior approval to conduct this study was obtained from the Cabrini Human Research Ethics Committee and Monash University Human Research Ethics Committee (Reference Numbers 02-21-01-19 and 16975 respectively). We did not obtain participant consent as all data was anonymised. Outcome Health holds a standing ethics approval for its collection and custodianship of the data from the Royal Australian College of General Practice. The study findings will be reported to Outcome Health, participating PHNs, disseminated in peer-reviewed academic journals and presented in national and international conferences.

## FIGURES

Figure 1. Database structure

Figure 2. Approach to dataset creation

1  
2  
3  
4  
5  
6  
7  
8  
9  
10  
11  
12  
13  
14  
15  
16  
17  
18  
19  
20  
21  
22  
23  
24  
25  
26  
27  
28  
29  
30  
31  
32  
33  
34  
35  
36  
37  
38  
39  
40  
41  
42  
43  
44  
45  
46

For peer review only



Table 1. Eligibility Criteria

| Patient population                                                                                           |                                     |                                                                                                  | Patient management         |                                |                                                                                                          |                                                                                                                                             |                                                                                                                                                                                                                                                                                                                                                                                                                                         |
|--------------------------------------------------------------------------------------------------------------|-------------------------------------|--------------------------------------------------------------------------------------------------|----------------------------|--------------------------------|----------------------------------------------------------------------------------------------------------|---------------------------------------------------------------------------------------------------------------------------------------------|-----------------------------------------------------------------------------------------------------------------------------------------------------------------------------------------------------------------------------------------------------------------------------------------------------------------------------------------------------------------------------------------------------------------------------------------|
| Diagnoses                                                                                                    | Provider                            | Patient                                                                                          | Practice                   | Activity                       | Referrals                                                                                                | Prescriptions                                                                                                                               | Imaging tests & procedures                                                                                                                                                                                                                                                                                                                                                                                                              |
| Low back<br>Knee<br>Shoulder<br>Neck<br><br><b>Exclude:</b><br>Trauma<br><br>Systemic inflammatory arthritis | Diagnosed by a general practitioner | Aged $\geq 18$ years for low back conditions<br><br>Aged $\geq 45$ years for all other diagnoses | Patient activity 2014-2018 | Face-to-face<br><br>Telehealth | Surgical specialists<br><br>Non-surgical specialists<br><br>Allied health providers<br>e.g. psychologist | Simple analgesics<br><br>Anti-inflammatory<br><br>Chondroitin/<br>Glucosamine<br><br>Topical products<br><br>Opioids<br><br>Neuromodulators | Lumbar plain radiograph<br><br>Lumbar CT<br><br>Lumbar MRI<br><br>Lumbar injection<br><br>Knee plain radiograph<br><br>Knee CT<br><br>Knee MRI<br><br>Knee ultrasound<br><br>Knee injection<br><br>Shoulder plain radiograph<br><br>Shoulder ultrasound<br><br>Shoulder MRI<br><br>Shoulder injection<br><br>Shoulder hydrodilatation<br><br>Cervical plain radiograph<br><br>Cervical CT<br><br>Cervical MRI<br><br>Cervical injection |

Table 2: Included SNOMED terms

| Low back diagnoses                  | Knee diagnoses                        | Shoulder diagnoses                         | Neck diagnoses                      |
|-------------------------------------|---------------------------------------|--------------------------------------------|-------------------------------------|
| Arthritis of spine                  | Acute meniscal tear, medial           | Acromioclavicular joint structure          | Cervical arthritis                  |
| Arthropathy of spinal facet joint   | Anterior knee pain                    | Adhesive capsulitis of shoulder            | Cervical arthrodesis                |
| Back problem                        | Arthritis of knee                     | Arthritis of acromioclavicular joint       | Cervical disc disorder              |
| Backache                            | Arthrodesis of knee                   | Arthrodesis of shoulder                    | Cervical kyphosis                   |
| Bone structure of coccyx            | Arthroscopic lateral patellar release | Arthrography of shoulder                   | Cervical laminectomy                |
| Bone structure of L5                | Arthroscopic meniscectomy             | Arthroscopic acromioplasty                 | Cervical myelopathy                 |
| Bone structure of sacrum            | Arthroscopic procedure                | Arthroscopic shoulder                      | Cervical nerve root compression     |
| Chondrectomy of spine               | Arthroscopy of knee                   | decompression                              | Cervical radiculitis                |
| Chronic back pain                   | Arthroscopy of knee with lateral      | Arthroscopy of shoulder                    | Cervical radiculopathy              |
| Chronic lower back pain             | meniscectomy                          | Bursitis of shoulder                       | Cervical rib                        |
| Compression fracture                | Arthroscopy of knee with medial       | Calcific tendinitis                        | Cervical spinal fusion by anterior  |
| Compression fracture of vertebral   | meniscectomy                          | Calcific tendinitis of shoulder            | technique                           |
| column                              | Arthrotomy of knee                    | Capsulitis                                 | Cervical spine degeneration         |
| Compression of lumbar nerve root    | Aspiration of knee joint              | Contusion of shoulder region               | Cervical spine structure            |
| Correction of scoliosis             | Both knees                            | Detachment of the glenoid labrum           | Cervicogenic headache               |
| Crush fracture of lumbar vertebra   | Bursitis of knee                      | and/or capsule of the shoulder joint       | Cervico-occipital neuralgia         |
| CT of lumbar region                 | Calcium pyrophosphate deposition      | Entire tendon of supraspinatus             | Chronic neck pain                   |
| CT of lumbar spine                  | disease                               | muscle                                     | CT of cervical spine                |
| CT of spine                         | Chondrocalcinosis                     | Full thickness rotator cuff tear           | CT of neck                          |
| Curvature of spine                  | Chondromalacia of patella             | Impingement syndrome of shoulder region    | Degeneration of cervical            |
| Decompression laminectomy           | Complete tear, knee, medial           | Inflammation of rotator cuff tendon        | intervertebral disc                 |
| Decompression of lumbar spine       | collateral ligament                   | Injury of glenoid labrum of shoulder joint | Diffuse cervicobrachial syndrome    |
| Degeneration of intervertebral disc | Contusion of knee                     | Injury of shoulder region                  | Excision of cervical intervertebral |
| Degeneration of lumbar              | Derangement of knee                   | MRI of shoulder                            | disc                                |
| intervertebral disc                 | Disorder of patellofemoral joint      | Osteoarthritis of acromioclavicular        | Injury of cervical spine            |
| Diagnostic radiography of coccyx    | Finding of tear meniscus              | joint                                      | Kyphoscoliosis deformity of spine   |
| Discitis                            | Fracture of tibial plateau            | Osteoarthritis of shoulder                 | Kyphosis deformity of spine         |
| Discogenic pain                     | Haemarthrosis of knee                 | Painful arc syndrome                       | Magnetic resonance imaging of neck  |
|                                     | Inflammation of bursa of patella      | Radiography of shoulder                    | MRI of cervical spine               |

|    |                                            |                                                    |                                                         |                                         |
|----|--------------------------------------------|----------------------------------------------------|---------------------------------------------------------|-----------------------------------------|
| 1  | Disorder of joint of spine                 | Injury of anterior cruciate ligament               | Repair of musculotendinous cuff of shoulder             | Muscle spasm of cervical muscle of neck |
| 2  | Disorder of vertebra                       | Injury of knee                                     | Repair of shoulder                                      | Neck injury                             |
| 3  | Exploration of spine                       | Knee joint - varus deformity                       | Rotator cuff impingement syndrome                       | Neck pain                               |
| 4  | Facet joint pain                           | Knee joint effusion                                | Rotator cuff syndrome                                   | Neck sprain                             |
| 5  | Fracture of body of vertebra               | Knee joint valgus deformity                        | Rupture of tendon of biceps                             | Neck structure                          |
| 6  | Fracture of lumbar spine                   | Knee locking                                       | Rupture of tendon of biceps, long head                  | Pain in cervical spine                  |
| 7  | Fracture of sacrum                         | Knee pain                                          | Shoulder pain                                           | Prolapsed cervical intervertebral disc  |
| 8  | Fracture of vertebral column               | Knee region structure                              | Shoulder reconstruction                                 | Radiography of cervical spine           |
| 9  | Injury of back                             | Knee stiff                                         | Shoulder region structure                               | Spinal stenosis in cervical region      |
| 10 | Injury of coccyx                           | Loose body in knee                                 | Shoulder strain                                         | Stiff neck                              |
| 11 | Intervertebral disc prolapse               | MRI of knee                                        | Shoulder tendinitis                                     | Strain of neck muscle                   |
| 12 | L4/5 disc                                  | Osteoarthritis of knee                             | Sprain of acromioclavicular ligament                    | Strain of tendon of neck                |
| 13 | L5/S1 disc                                 | Osteotomy of proximal tibia                        | Sprain of shoulder                                      | Torticollis                             |
| 14 | Laminectomy                                | Osteotomy of tibia                                 | Structure of left shoulder region                       | Whiplash injury to neck                 |
| 15 | Lordosis deformity of spine                | Patellar instability                               | Structure of right shoulder region                      |                                         |
| 16 | Low back pain                              | Patellar maltracking                               | Structure of rotator cuff including muscles and tendons |                                         |
| 17 | Low back strain                            | Patellar tendonitis                                | Subacromial bursitis                                    |                                         |
| 18 | Lower back injury                          | Patellectomy                                       | Subdeltoid bursitis                                     |                                         |
| 19 | Lower back structure                       | Patellofemoral osteoarthritis                      | Subluxation of acromioclavicular joint                  |                                         |
| 20 | Lumbar                                     | Patellofemoral stress syndrome                     | Subscapularis tendinitis                                |                                         |
| 21 | Lumbar discectomy                          | Prepatellar bursitis                               | Supraspinatus tear                                      |                                         |
| 22 | Lumbar laminectomy                         | Problem knee                                       | Supraspinatus tendinitis                                |                                         |
| 23 | Lumbar microdiscectomy                     | Radiologic examination of knee                     | Total shoulder replacement                              |                                         |
| 24 | Lumbar radiculopathy                       | Repair of anterior cruciate ligament of knee joint | US shoulder region                                      |                                         |
| 25 | Lumbar region back structure               | Repair of knee collateral ligaments                |                                                         |                                         |
| 26 | Lumbar spinal fusion                       | Repair of knee cruciate ligaments                  |                                                         |                                         |
| 27 | Lumbar sprain                              | Repair of knee cruciate ligaments                  |                                                         |                                         |
| 28 | Lumbosacral spine                          | Repair of meniscus                                 |                                                         |                                         |
| 29 | Lumbosacral spondylosis                    | Repair of patellar tendon                          |                                                         |                                         |
| 30 | Lumbosacral spondylosis without myelopathy | Replacement of total knee joint                    |                                                         |                                         |
| 31 |                                            | Rupture of anterior cruciate                       |                                                         |                                         |

1  
2  
3  
4  
5  
6  
7  
8  
9  
10  
11  
12  
13  
14  
15  
16  
17  
18  
19  
20  
21  
22  
23  
24  
25  
26  
27  
28  
29  
30  
31  
32  
33  
34  
35  
36  
37  
38  
39  
40  
41  
42  
43  
44  
45  
46

|                                         |                                               |  |  |
|-----------------------------------------|-----------------------------------------------|--|--|
| Lumbosacral strain                      | ligament                                      |  |  |
| Lumbosacral radiculopathy               | Rupture of cruciate ligaments                 |  |  |
| Magnetic resonance imaging of spine     | Rupture of medial collateral ligament of knee |  |  |
| Manipulation of spine                   | Rupture of posterior cruciate ligament        |  |  |
| MRI of lumbar spine                     | Sprain of knee                                |  |  |
| Nerve root compression syndrome         | Sprain of lateral collateral ligament of knee |  |  |
| Nerve root disorder                     | Sprain of medial collateral ligament of knee  |  |  |
| Operative procedure on spinal structure | Stabilisation of patellofemoral joint         |  |  |
| Osteoarthritis of lumbar spine          | Strain of knee                                |  |  |
| Pain in lumbar spine                    | Strain of patellar tendon                     |  |  |
| Pain in the coccyx                      | Strain of tendon of medial thigh muscle       |  |  |
| Prolapsed lumbar intervertebral disc    | Structure of left knee                        |  |  |
| Radiography of spine                    | Structure of prepatellar bursa                |  |  |
| Sacral back pain                        | Structure of right knee                       |  |  |
| Sacroiliac arthrodesis                  | Subluxation of patellofemoral joint           |  |  |
| Sacroiliac joint inflamed               | Suprapatellar bursitis                        |  |  |
| Sacroiliac joint pain                   | Swollen knee                                  |  |  |
| Scoliosis deformity of spine            | Synovial cyst of knee                         |  |  |
| Scoliosis of lumbar spine               | Synovial cyst of popliteal space              |  |  |
| Spasm of back muscles                   | Tear of lateral meniscus of knee              |  |  |
| Spinal arthritis deformans              | Tear of medial meniscus of knee               |  |  |
| Spinal arthrodesis                      | Tear of meniscus of knee                      |  |  |
| Spinal claudication                     | Total knee replacement                        |  |  |
| Spinal injury                           | Total replacement of left knee joint          |  |  |
| Spinal stenosis                         | Total replacement of right knee joint         |  |  |
| Spinal stenosis of lumbar region        | Traumatic rupture of patellar                 |  |  |
| Spondylitis                             |                                               |  |  |
| Spondylolisthesis                       |                                               |  |  |

1  
2  
3  
4  
5  
6  
7  
8  
9  
10  
11  
12  
13  
14  
15  
16  
17  
18  
19  
20  
21  
22  
23  
24  
25  
26  
27  
28  
29  
30  
31  
32  
33  
34  
35  
36  
37  
38  
39  
40  
41  
42  
43  
44  
45  
46

|                                     |               |  |  |
|-------------------------------------|---------------|--|--|
| Spondylolisthesis L5/S1 level       | tendon        |  |  |
| Spondylolysis                       | Unstable knee |  |  |
| Spondylosis                         |               |  |  |
| Spondylosis without myelopathy      |               |  |  |
| Sprain of spinal ligament           |               |  |  |
| Sprain, lumbosacral ligament        |               |  |  |
| Stenosis of intervertebral foramina |               |  |  |
| Stiff back                          |               |  |  |
| Vertebral osteoporosis              |               |  |  |
| Vertebroplasty                      |               |  |  |
| Wedge fracture of vertebra          |               |  |  |
| X-ray of lumbosacral spine          |               |  |  |

For peer review only

Table 3: Included medication names

| Simple analgesics (N02BE*)                                                                                      | Non-steroidal anti-inflammatories (M01A*)                                                                                                                                                                                                                                                                                                                                     | Chondroitin and/or glucosamine (M01AX*)                                                                                                                                                                                                                                                                                                                                                                                                                                                                                                                                                | Topical products for joint and muscular pain (M02A*)                                                                                                                                                                                                                                                                                                                                                                                                                                                                                                                                                                                                                                                                                     | Opioids (N02A*)                                                                                                                                                                                                                                                                                                                                                                                                                                                      | Other epileptics (N03AX*) |
|-----------------------------------------------------------------------------------------------------------------|-------------------------------------------------------------------------------------------------------------------------------------------------------------------------------------------------------------------------------------------------------------------------------------------------------------------------------------------------------------------------------|----------------------------------------------------------------------------------------------------------------------------------------------------------------------------------------------------------------------------------------------------------------------------------------------------------------------------------------------------------------------------------------------------------------------------------------------------------------------------------------------------------------------------------------------------------------------------------------|------------------------------------------------------------------------------------------------------------------------------------------------------------------------------------------------------------------------------------------------------------------------------------------------------------------------------------------------------------------------------------------------------------------------------------------------------------------------------------------------------------------------------------------------------------------------------------------------------------------------------------------------------------------------------------------------------------------------------------------|----------------------------------------------------------------------------------------------------------------------------------------------------------------------------------------------------------------------------------------------------------------------------------------------------------------------------------------------------------------------------------------------------------------------------------------------------------------------|---------------------------|
| Caffeine,<br>Paracetamol<br>Paracetamol<br><br><b>Paracetamol combinations</b><br><br>Ibuprofen,<br>Paracetamol | Celecoxib<br>Diclofenac<br>Diclofenac potassium<br>Diclofenac sodium<br>Diclofenac sodium, Misoprostol<br>Diclofenac, Misoprostol<br>Etoricoxib<br>Flurbiprofen<br>Ibuprofen<br>Ibuprofen lysine<br>Indomethacin<br>Ketoprofen<br>Ketorolac<br>Ketorolac trometamol<br>Lumiracoxib<br>Mefenamic acid<br>Meloxicam<br>Naproxen<br>Naproxen sodium<br>Naproxen,<br>Esomeprazole | Borate, Chondroitin, Glucosamine, Manganese<br><br>Borate, Chondroitin, Glucosamine, Manganese<br><br>Chondroitin, Copper, Glucosamine, Manganese, Zinc Sulfate<br><br>Chondroitin, Dimethyl Sulfone, Glucosamine<br><br>Glucosamine<br><br>Glucosamine, Calcium, Vitamin D, Minerals<br><br>Glucosamine, Chondroitin<br><br>Glucosamine hydrochloride<br><br>Glucosamine hydrochloride, Chondroitin sulphate<br><br>Glucosamine hydrochloride, Chondroitin sulfate, Dimethyl sulfone<br><br>Glucosamine hydrochloride; Chondroitin sulfate,<br>Manganese gluconate, Calcium ascorbate | Benzydamine<br>Benzydamine hydrochloride<br>Cajuput oil, Camphor, Capsicum, Eucalyptus oil, Hydroxybenzoate, Mentha X Piperita, Menthol, Methyl salicylate, Pinus, Turpentine oil<br>Cajuput oil, Camphor, Clove, Menthol (TIGER BALM)<br>Camphor, Menthol, Eucalyptus oil, Methyl salicylate<br>Camphor, Eucalyptus oil, Mentha X Piperita, Menthol, Methyl salicylate, Pinus, Turpentine oil<br>Camphor, Menthol, Methyl salicylate<br>Camphor, Eucalyptus oil, Menthol, Methyl salicylate<br>Camphor, Eucalyptus oil, Methyl salicylate, Menthol, Alisma plantago aquatica Root oil extract, Bambusa root<br>Capsaicin<br>Capsicum oleoresin, Arnica montana, Arctium lappa root dry, Aloe barbadensis inner leaf juice<br>Diclofenac | <b>Weak single opioids</b><br>Codeine<br>Codeine phosphate<br>Codeine phosphate hemihydrate<br>Dextropropoxyphene<br>Dextropropoxyphene napsylate<br>Dihydrocodeine<br>Dihydrocodeine tartrate<br>Tramadol<br>Tramadol hydrochloride<br><br><b>Combination weak opioid</b><br>Aspirin, Codeine phosphate<br>Codeine, Ibuprofen<br>Codeine phosphate, Ibuprofen<br>Codeine, Paracetamol<br>Codeine Phosphate, Paracetamol<br>Codeine phosphate hemihydrate, Ibuprofen | Gabapentin<br>Pregabalin  |

|    |                  |                                  |                                         |                              |
|----|------------------|----------------------------------|-----------------------------------------|------------------------------|
| 1  |                  |                                  |                                         |                              |
| 2  |                  |                                  |                                         |                              |
| 3  |                  |                                  |                                         |                              |
| 4  | Parecoxib        | Glucosamine hydrochloride,       | Diclofenac diethylamine                 | Dextropropoxyphene,          |
| 5  | Parecoxib sodium | Calcium, Vitamin D, Vitamin K,   | Diclofenac diethylammonium              | Paracetamol                  |
| 6  | Piroxicam        | Boron                            | Diclofenac Sodium                       | Dextropropoxyphene           |
| 7  | Rofecoxib        | Glucosamine hydrochloride;       | Ethyl salicylate, Hydroxyethyl          | napsylate, Paracetamol       |
| 8  | Sulindac         | Glucosamine sulfate, Glycine,    | salicylate, Methyl salicylate,          | Tramadol, Paracetamol        |
| 9  | Tiaprofenic acid | fructose, Bioflavonoids,         | Nicotinic acid                          | Tramadol hydrochloride,      |
| 10 |                  | Ascorbic acid, Histidine, Lysine | Eucalyptus oil                          | Paracetamol                  |
| 11 |                  | hydrochloride, Leucine, Valine,  |                                         |                              |
| 12 |                  | Perna caniculata powder,         | Eucalyptus oil, Pine oil Pumilio,       | <b>Strong single opioids</b> |
| 13 |                  | Calcium pantothenate, Zinc       | Peppermint oil, Camphor, Methyl         | Fentanyl                     |
| 14 |                  | amino acid chelate,              | salicylate, Menthol, Turpentine oil     | Fentanyl citrate             |
| 15 |                  | Manganese amino acid             | Eucalyptus oil, Menthol, Methyl         | Hydromorphone                |
| 16 |                  | chelate, Copper gluconate,       | salicylate                              | Hydromorphone                |
| 17 |                  | Selenomethionine                 | Flurbiprofen sodium                     | hydrochloride                |
| 18 |                  | Glucosamine, Omega-3             | Ibuprofen                               | Morphine                     |
| 19 |                  | triglycerides                    | Ketoprofen                              | Morphine hydrochloride       |
| 20 |                  | Glucosamine sulfate              | Menthol                                 | Morphine hydrochloride       |
| 21 |                  | Glucosamine sulfate,             | Menthol, Camphor, Cajuput oil,          | Morphine hydrochloride       |
| 22 |                  | Chondroitin sulfate (Shark)      | Clove oil, Dementholised mint oil       | trihydrate                   |
| 23 |                  | Glucosamine sulfate, Shark       | Menthol, Camphor, Cajuput oil,          | Morphine sulfate             |
| 24 |                  | cartilage                        | Dementholised mint oil, Clove bud       | Morphine sulfate Bp          |
| 25 |                  | Glucosamine sulfate,             | oil                                     | Morphine sulfate             |
| 26 |                  | Potassium chloride               | Menthol, Glycol salicylate              | pentahydrate                 |
| 27 |                  | Glucosamine sulfate sodium       | Menthol, Eucalyptus oil, Methyl         | Morphine tartrate            |
| 28 |                  | chloride, Eicosapentaenoic       | salicylate                              | Oxycodone                    |
| 29 |                  | acid, Docosahexaenoic acid       | Methyl salicylate                       | Oxycodone, Naloxone          |
| 30 |                  | Ascorbate, Glucosamine,          | Methyl salicylate, Ethyl salicylate, 2- | Oxycodone hydrochloride      |
| 31 |                  | Manganese, Turmeric              | Hydroxyethyl salicylate, Methyl         | Oxycodone pectinate          |
| 32 |                  | Borate, Glucosamine,             | nicotinate                              |                              |
| 33 |                  | Manganese, Selenium              |                                         |                              |
| 34 |                  |                                  |                                         |                              |
| 35 |                  |                                  |                                         |                              |
| 36 |                  |                                  |                                         |                              |
| 37 |                  |                                  |                                         |                              |
| 38 |                  |                                  |                                         |                              |
| 39 |                  |                                  |                                         |                              |
| 40 |                  |                                  |                                         |                              |
| 41 |                  |                                  |                                         |                              |
| 42 |                  |                                  |                                         |                              |
| 43 |                  |                                  |                                         |                              |
| 44 |                  |                                  |                                         |                              |
| 45 |                  |                                  |                                         |                              |
| 46 |                  |                                  |                                         |                              |



1  
2  
3  
4  
5  
6  
7  
8  
9  
10  
11  
12  
13  
14  
15  
16  
17  
18  
19  
20  
21  
22  
23  
24  
25  
26  
27  
28  
29  
30  
31  
32  
33  
34  
35  
36  
37  
38  
39  
40  
41  
42  
43  
44  
45  
46

|  |  |                                                                                                                                                                    |                                                                                                                                                                                                                     |                                                                                              |  |
|--|--|--------------------------------------------------------------------------------------------------------------------------------------------------------------------|---------------------------------------------------------------------------------------------------------------------------------------------------------------------------------------------------------------------|----------------------------------------------------------------------------------------------|--|
|  |  | Ascorbate, Cod-liver oil,<br>Colecalciferol, Copper,<br>Cyanocobalamin, Folate,<br>Glucosamine, Manganese,<br>Omega-3 triglycerides,<br>Selenium, Tocopherol, Zinc | Methyl salicylate, Eucalyptus oil,<br>Menthol liquid<br>Methyl salicylate, Menthol<br>Nicoboxil/Nonivamide<br>Nonivamide, Butoxyethyl nicotinate<br>Piroxicam<br>Triethanolamine salicylate<br>Trolamine salicylate | Oxycodone hydrochloride,<br>Naloxone hydrochloride<br>Tapentadol<br>Tapentadol hydrochloride |  |
|--|--|--------------------------------------------------------------------------------------------------------------------------------------------------------------------|---------------------------------------------------------------------------------------------------------------------------------------------------------------------------------------------------------------------|----------------------------------------------------------------------------------------------|--|

\* Anatomic and Therapeutic Classifications (ATC) category

For peer review only

**Table 4: Test name subgroups for low back, knee, shoulder, and neck imaging tests and procedures**

| Low back imaging subgroups    | Knee imaging subgroups | Shoulder imaging subgroups | Neck imaging subgroups |
|-------------------------------|------------------------|----------------------------|------------------------|
| Lumbosacral plain radiograph* | Knee plain radiograph* | Shoulder plain radiograph* | Neck plain radiograph* |
| Lumbosacral CT*               | Knee CT*               | Shoulder ultrasound*       | Neck CT*               |
| Lumbosacral MRI*              | Knee MRI*              | Shoulder MRI*              | Neck MRI*              |
| Lumbosacral injection*        | Knee injection*        | Shoulder injection*        | Neck injection*        |
| Lumbosacral unspecified*#     | Knee unspecified*#     | Shoulder unspecified*#     | Neck unspecified*#     |
| Lumbosacral ultrasound^       | Knee ultrasound*       | Shoulder hydrodilataion*   | Neck ultrasound^       |
| Lumbosacral other^            | Knee other^            | Shoulder other^            | Neck other^            |
|                               | Knee aspiration^       | Shoulder aspiration^       | Neck aspiration^       |
|                               | Knee arthrogram^       | Shoulder arthrogram^       |                        |
|                               |                        | Shoulder CT^               |                        |
|                               |                        | Shoulder fluoroscopy^      |                        |

\* Eligible

^ Ineligible

# Analyse as plain radiograph

## **AUTHOR CONTRIBUTIONS**

RH, DOC and RB conceived the study. LB and AG were responsible for data coding and the statistical analysis plan. All authors contributed to refining the protocol and approved the submitted protocol.

## **FUNDING STATEMENT**

This work was supported by an Arthritis Queensland, Arthritis South Australia and the Allan and Beryl Stephens Grant from Arthritis Australia (ID N/A). Arthritis Australia did not contribute to the conduct of this study. It is also supported by an Australian National Health and Medical Research Council (NHMRC) Program Grant (APP1113532). DOC is supported by a TRIP Fellowship and RB is supported by an NHMRC Investigator Fellowship.

## **COMPETING INTERESTS STATEMENT**

RH, DOC, RB and DM report grants from Arthritis Australia (not-for-profit organisation), during the conduct of the study. CP is an employee of Outcome Health, the not-for-profit organisation that developed the POLAR database and chairs the Product improvement group of the Australian Digital Health Agency. It has no relationship with the research but has provided grant funding to Outcome Health. LB reports consultancy fees paid to Monash University from Charite Medical University Berlin, Jesuit Social Services Victoria, and Swinburne University of Technology, outside the submitted work.

## REFERENCES

1. Royal Australian College of General Practitioners. General Practice: Health of the Nation. East Melbourne, Vic: RACGP, 2019.
2. Britt H MG, Henderson J, Bayram C, Harrison C, Valenti L, Pan Y, Charles J, Pollack AJ, Wong C, Gordon J. General practice activity in Australia 2015–16. General practice series no. 40. Sydney: Sydney University Press, 2016.
3. Rahman N, Gruber D. The burden of musculoskeletal conditions in Australia: a detailed analysis of the Australian Burden of Disease Study 2011: Australian Institute of Health and Welfare 2017.
4. Vos T, Lim SS, Abbafati C, et al. Global burden of 369 diseases and injuries in 204 countries and territories, 1990–2019: a systematic analysis for the Global Burden of Disease Study 2019. *The Lancet* 2020;396(10258):1204-22.
5. Britt H MG, Bayram C, Henderson J, Valenti L, Harrison C, Pan Y, Charles J, Pollack AJ CT, Gordon J, Wong C. A decade of Australian general practice activity 2006–07 to 2015–16. General practice series no. 41. Sydney: Sydney University Press, 2016.
6. Bennell KL BC, Harrison C, Brand C, Buchbinder R, Haas R, and Hinman RS. Trends in management of hip and knee osteoarthritis in general practice in Australia over an 11-year window: a nationwide cross-sectional survey. *The Lancet Regional Health – Western Pacific* 2021;12 doi: <https://authors.elsevier.com/sd/article/S2666606521000961>
7. Naunton J, Harrison C, Britt H, et al. General practice management of rotator cuff related shoulder pain: A reliance on ultrasound and injection guided care. *Plos one* 2020;15(1):e0227688.
8. Busingye D, Gianacas C, Pollack A, et al. Data Resource Profile: MedicineInsight, an Australian national primary health care database. *International Journal of Epidemiology* 2019;48(6):1741-41h.
9. Pearce C, McLeod A, Rinehart N, et al. What a Comprehensive, Integrated Data Strategy Looks Like: The Population Level Analysis and Reporting (POLAR) Program. *Stud Health Technol Inform* 2019;264:303-07.
10. de Lusignan S, Sun B, Pearce C, et al. Coding errors in an analysis of the impact of pay-for-performance on the care for long-term cardiovascular disease: a case study. *Journal of Innovation in Health Informatics* 2014;21(2):92-101.
11. Hemkens LG, Benchimol EI, Langan SM, et al. The reporting of studies using routinely collected health data was often insufficient. *Journal of clinical epidemiology* 2016;79:104-11.
12. Benchimol EI, Smeeth L, Guttman A, et al. The REporting of studies Conducted using Observational Routinely-collected health Data (RECORD) statement. *PLoS Med* 2015;12(10):e1001885.
13. Healthmap: Healthdirect Australia; [Available from: <https://studio.healthmap.com.au/#/h4f> accessed 27th September 2020.
14. The State of Victoria Department of Premier and Cabinet. Population Diversity in Victoria: 2016 Census Local Government Areas, 2018.
15. Yan J, Hawes L, Turner L, et al. Antimicrobial prescribing for children in primary care. *Journal of paediatrics and child health* 2019;55(1):54-58.
16. Turner LR, Pearce C, Borg M, et al. Characteristics of patients presenting to an after-hours clinic: results of a MAGNET analysis. *Australian journal of primary health* 2017;23(3):294-99.
17. Turner LR, Cicuttini F, Pearce C, et al. Cardiovascular disease screening in general practice: General practitioner recording of common risk factors. *Preventive medicine* 2017;99:282-85.
18. Sezgin G, Georgiou A, Hardie R-A, et al. Compliance with pathology testing guidelines in Australian general practice: protocol for a secondary analysis of electronic health record data. *BMJ open* 2018;8(11)
19. Australian Institute of Health and Welfare. Musculoskeletal conditions and comorbidity in Australia. Canberra: AIHW, 2019.

- 1
- 2
- 3
- 4 20. Pearce C, McLeod A, Patrick J, et al. Coding and classifying GP data: the POLAR project. *BMJ health & care informatics* 2019;26(1)
- 5
- 6 21. Cotd R, Rothwell D, Palotay J, et al. The Systematized Nomenclature of Human and Veterinary
- 7 Medicine-SNOMED International. *Northfield, IL: College of American Pathologists* 1993
- 8 22. World Health Organization. WHO collaborating Centre for Drug Statistics Methodology: ATC
- 9 classification index with DDDs and guidelines for ATC classification and DDD assignment
- 10 2020. *Oslo, Norway: Norwegian Institute of Public Health* 2019
- 11 23. Hovis KK, Alizai H, Tham S-C, et al. Non-traumatic anterior cruciate ligament abnormalities and
- 12 their relationship to osteoarthritis using morphological grading and cartilage T2 relaxation
- 13 times: data from the Osteoarthritis Initiative (OAI). *Skeletal radiology* 2012;41(11):1435-43.
- 14 24. Buchbinder R, Underwood M, Hartvigsen J, et al. The Lancet Series call to action to reduce low
- 15 value care for low back pain: an update. *Pain* 2020;161(1):S57.
- 16 25. Mathieson S, Wertheimer G, Maher C, et al. What proportion of patients with chronic noncancer
- 17 pain are prescribed an opioid medicine? Systematic review and meta-regression of
- 18 observational studies. *Journal of Internal Medicine* 2020;287(5):458-74.
- 19 26. Ittaman SV, VanWormer JJ, Rezkalla SH. The role of aspirin in the prevention of cardiovascular
- 20 disease. *Clinical medicine & research* 2014;12(3-4):147-54.
- 21 27. Herrett E, Gallagher AM, Bhaskaran K, et al. Data resource profile: clinical practice research
- 22 datalink (CPRD). *International journal of epidemiology* 2015;44(3):827-36.
- 23 28. Springate DA, Kontopantelis E, Ashcroft DM, et al. ClinicalCodes: an online clinical codes
- 24 repository to improve the validity and reproducibility of research using electronic medical
- 25 records. *PloS one* 2014;9(6):e99825.
- 26 29. Australian Bureau of Statistics. Socio-economic indexes for areas (SEIFA) - technical paper 2016.
- 27 *cat no 20330 55001* 2018
- 28 30. Halpin B. SADI: Sequence analysis tools for Stata. *The Stata Journal* 2017;17(3):546-72.
- 29 31. Dalmaijer ES, Nord CL, Astle DE. Statistical power for cluster analysis. *arXiv preprint*
- 30 *arXiv:200300381* 2020
- 31 32. Imai C, Hardie R-A, Franco GS, et al. Harnessing the potential of electronic general practice
- 32 pathology data in Australia: An examination of the quality use of pathology for type 2
- 33 diabetes patients. *International Journal of Medical Informatics* 2020;141:104189.
- 34 33. Harrison C, Britt H, Miller G, et al. Prevalence of chronic conditions in Australia. *PloS one*
- 35 2013;8(7):e67494.
- 36
- 37
- 38
- 39
- 40
- 41
- 42
- 43
- 44
- 45
- 46
- 47
- 48
- 49
- 50
- 51
- 52
- 53
- 54
- 55
- 56
- 57
- 58
- 59
- 60

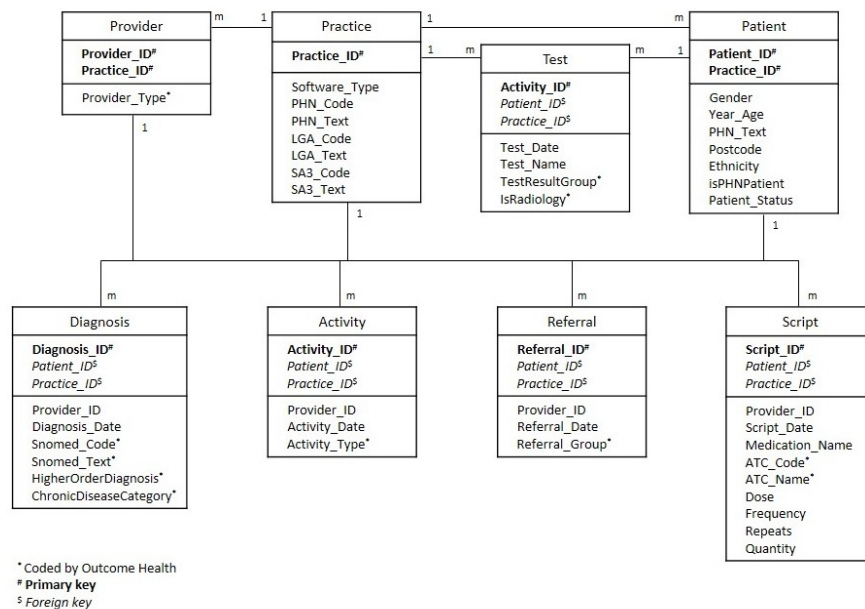

Figure 1

271x186mm (96 x 96 DPI)

1  
2  
3  
4  
5  
6  
7  
8  
9  
10  
11  
12  
13  
14  
15  
16  
17  
18  
19  
20  
21  
22  
23  
24  
25  
26  
27  
28  
29  
30  
31  
32  
33  
34  
35  
36  
37  
38  
39  
40  
41  
42  
43  
44  
45  
46  
47  
48  
49  
50  
51  
52  
53  
54  
55  
56  
57  
58  
59  
60

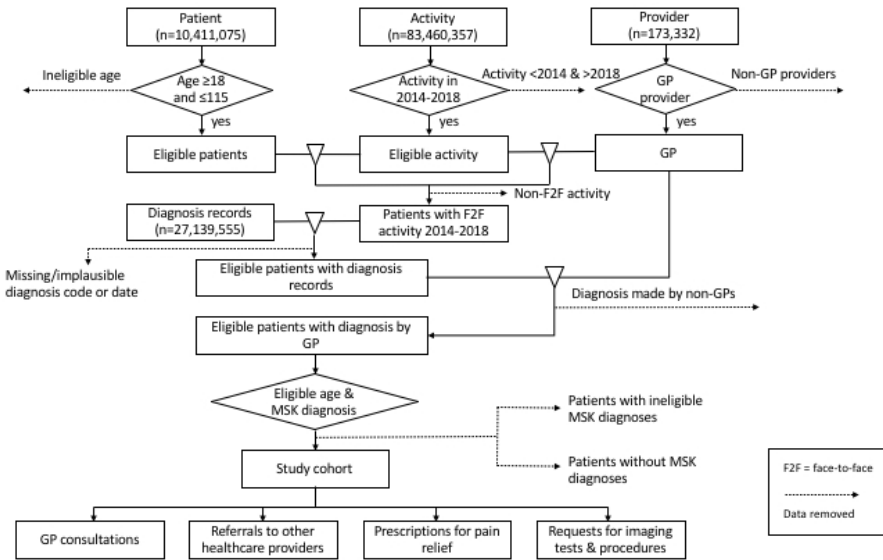

Figure 2

60x34mm (300 x 300 DPI)



## Appendix 1. Initial string match terms used to code imaging records

| Imaging region strings                                                                    | X-ray strings                                                                                                                                                                                                                                                                                          | MRI strings                                                                                                                                                                                   | CT strings                                        | Ultrasound strings                                                                                                              |
|-------------------------------------------------------------------------------------------|--------------------------------------------------------------------------------------------------------------------------------------------------------------------------------------------------------------------------------------------------------------------------------------------------------|-----------------------------------------------------------------------------------------------------------------------------------------------------------------------------------------------|---------------------------------------------------|---------------------------------------------------------------------------------------------------------------------------------|
| <b>Knee</b>                                                                               |                                                                                                                                                                                                                                                                                                        |                                                                                                                                                                                               |                                                   |                                                                                                                                 |
| KNEE<br>KN<br>BOTH K*<br><br><b>Exclude:</b><br>KNOW<br>KNIGHT                            | X-RAY KN<br>X-RAY RIGHT KN<br>X-RAY LEFT KN<br>XRAY KN<br>XRAY RIGHT KN<br>XRAY LEFT KN<br>XR KN<br>XR RIGHT KN<br>XR LEFT KN<br>PLAIN FILM KN<br>PLAIN FILM RIGHT KN<br>PLAIN FILM LEFT KN<br>RADIOGRAPH KN<br>RADIOGRAPH RIGHT KN<br>RADIOGRAPH LEFT KN<br>KNEE X<br>KNEE RADIOGR<br>KNEE PLAIN FILM | MRI KN<br>MRI RIGHT KN<br>MRI LEFT KN<br>MR KN<br>MR RIGHT KN<br>MR LEFT KN<br>MAGNETIC RESONANCE KN<br>MAGNETIC RESONANCE RIGHT KN<br>MAGNETIC RESONANCE LEFT KN<br>KNEE MR<br>KNEE MAGNETIC | CT KN<br>CT RIGHT KN<br>CT LEFT KN<br>KNEE CT     | US KN<br>US RIGHT KN<br>US LEFT KN<br>ULTRASOUND KN<br>ULTRASOUND RIGHT KN<br>ULTRASOUND LEFT KN<br>KNEE US<br>KNEE ULT         |
| <b>Shoulder</b>                                                                           |                                                                                                                                                                                                                                                                                                        |                                                                                                                                                                                               |                                                   |                                                                                                                                 |
| SHOULDER<br>SH<br>CLAVICLE*<br><br><b>Exclude:</b><br>SHBG<br>TSH<br>SHEET<br>FSH<br>GSHS | X-RAY SH<br>X-RAY RIGHT SH<br>X-RAY LEFT SH<br>XRAY SH<br>XRAY RIGHT SH<br>XRAY LEFT SH<br>XR SH<br>XR RIGHT SH<br>XR LEFT SH<br>PLAIN FILM SH                                                                                                                                                         | MRI SH<br>MRI RIGHT SH<br>MRI LEFT SH<br>MR SH<br>MR RIGHT SH<br>MR LEFT SH<br>MAGNETIC RESONANCE SH<br>MAGNETIC RESONANCE RIGHT SH<br>MAGNETIC RESONANCE LEFT SH<br>SHOULDER MR              | CT SH<br>CT RIGHT SH<br>CT LEFT SH<br>SHOULDER CT | US SH<br>US RIGHT SH<br>US LEFT SH<br>ULTRASOUND SH<br>ULTRASOUND RIGHT SH<br>ULTRASOUND LEFT SH<br>SHOULDER US<br>SHOULDER ULT |

|                                                                                         |                                                                                                                                                                                                                                                                                      |                                                                              |                                                  |                                                                                                                        |
|-----------------------------------------------------------------------------------------|--------------------------------------------------------------------------------------------------------------------------------------------------------------------------------------------------------------------------------------------------------------------------------------|------------------------------------------------------------------------------|--------------------------------------------------|------------------------------------------------------------------------------------------------------------------------|
| PSH<br>SH/                                                                              | PLAIN FILM RIGHT SH<br>PLAIN FILM LEFT SH<br>RADIOGRAPH SH<br>RADIOGRAPH RIGHT SH<br>RADIOGRAPH LEFT SH<br>SHOULDER X<br>SHOULDER RADIOGR<br>SHOULDER PLAIN FILM                                                                                                                     | SHOULDER MAGNETIC                                                            |                                                  |                                                                                                                        |
| <b>Neck</b>                                                                             |                                                                                                                                                                                                                                                                                      |                                                                              |                                                  |                                                                                                                        |
| NECK<br>NEC<br>CERVIC<br>C1<br>C2<br>C3<br>C4<br>C5<br>C6<br>C7<br>C SPINE<br>SPINE CX* | X-RAY NECK<br>XRAY NECK<br>XR NECK<br>X-RAY CERVICAL<br>XRAY CERVICAL<br>XR CERVICAL<br>PLAIN FILM NECK<br>PLAIN FILM CERVICAL<br>RADIOGRAPH NECK<br>RADIOGRAPH CERVICAL<br>NECK X<br>CERVICAL X<br>NECK PLAIN FILM<br>CERVICAL PLAIN FILM<br>NECK RADIOGRAPH<br>CERVICAL RADIOGRAPH | MRI NECK<br>MR NECK<br>MRI CERVICAL<br>MR CERVICAL<br>NECK MR<br>CERVICAL MR | CT NECK<br>CT CERVICAL<br>NECK CT<br>CERVICAL CT | US NECK<br>US CERVICAL<br>ULTRASOUND NECK<br>ULTRASOUND CERVICAL<br>NECK US<br>CERVICAL US<br>NECK ULT<br>CERVICAL ULT |
| <b>Exclude:</b><br>FEMORAL NECK<br>CERVICAL CYTOLOGY                                    |                                                                                                                                                                                                                                                                                      |                                                                              |                                                  |                                                                                                                        |
| <b>Low back</b>                                                                         |                                                                                                                                                                                                                                                                                      |                                                                              |                                                  |                                                                                                                        |
| LUMB<br>SACR<br>L1<br>L2<br>L3<br>L4<br>L5                                              | X-RAY LUMB<br>XRAY LUMB<br>XR LUMB<br>X-RAY SACR<br>XRAY SACR<br>XR SACR<br>PLAIN FILM LUMB                                                                                                                                                                                          | MRI LUMB<br>MR LUMB<br>MRI SACR<br>MR SACR<br>LUMBAR MR<br>SACRAL MR         | CT LUMB<br>CT SACR<br>LUMBAR CT<br>SACRAL CT     | US LUMB<br>ULTRASOUND LUMB<br>US SACR<br>ULTRASOUND SACR<br>LUMBAR US<br>LUMBAR ULT<br>SACRAL US                       |

|                                                      |                                                                                                                                                                                  |  |  |                   |
|------------------------------------------------------|----------------------------------------------------------------------------------------------------------------------------------------------------------------------------------|--|--|-------------------|
| <p>LOWER BACK</p> <p><b>Exclude:</b><br/>FUNGAL2</p> | <p>PLAIN FILM SACR<br/>RADIOGRAPH LUMB<br/>RADIOGRAPH SACR<br/>LUMBAR X<br/>LUMBAR RADIOGRAPH<br/>LUMBAR PLAIN FILM<br/>SACRAL X<br/>SACRAL RADIOGRAPH<br/>SACRAL PLAIN FILM</p> |  |  | <p>SACRAL ULT</p> |
|------------------------------------------------------|----------------------------------------------------------------------------------------------------------------------------------------------------------------------------------|--|--|-------------------|

\*String match term added after initial coding

1  
2  
3  
4  
5  
6  
7  
8  
9  
10  
11  
12  
13  
14  
15  
16  
17  
18  
19  
20  
21  
22  
23  
24  
25  
26  
27  
28  
29  
30  
31  
32  
33  
34  
35  
36  
37  
38  
39  
40  
41  
42  
43  
44  
45  
46

**Appendix 2**

**The RECORD statement – checklist of items, extended from the STROBE statement that should be reported in observational studies using routinely collected health data.**

|                           | Item No. | STROBE items                                                                                                                                                                               | Location in manuscript where items are reported                                                                                                                                                                | RECORD items                                                                                                                                                                                                                                                                                                                                                                                                                                | Location in manuscript where items are reported                                                                                                                              |
|---------------------------|----------|--------------------------------------------------------------------------------------------------------------------------------------------------------------------------------------------|----------------------------------------------------------------------------------------------------------------------------------------------------------------------------------------------------------------|---------------------------------------------------------------------------------------------------------------------------------------------------------------------------------------------------------------------------------------------------------------------------------------------------------------------------------------------------------------------------------------------------------------------------------------------|------------------------------------------------------------------------------------------------------------------------------------------------------------------------------|
| <b>Title and abstract</b> |          |                                                                                                                                                                                            |                                                                                                                                                                                                                |                                                                                                                                                                                                                                                                                                                                                                                                                                             |                                                                                                                                                                              |
|                           | 1        | (a) Indicate the study’s design with a commonly used term in the title or the abstract (b) Provide in the abstract an informative and balanced summary of what was done and what was found | a) Study design (observational cohort study) is included in the title<br><br>b) Abstract (methods and analysis) contains a summary of what was done. As this is a protocol, what was found is not applicable   | RECORD 1.1: The type of data used should be specified in the title or abstract. When possible, the name of the databases used should be included.<br><br>RECORD 1.2: If applicable, the geographic region and timeframe within which the study took place should be reported in the title or abstract.<br><br>RECORD 1.3: If linkage between databases was conducted for the study, this should be clearly stated in the title or abstract. | Title & abstract<br><br>Methods and analysis of Abstract refers to geographic region (South Eastern Victoria) and timeframe within the study (1/1/14 to 31/12/18)<br><br>N/A |
| <b>Introduction</b>       |          |                                                                                                                                                                                            |                                                                                                                                                                                                                |                                                                                                                                                                                                                                                                                                                                                                                                                                             |                                                                                                                                                                              |
| Background rationale      | 2        | Explain the scientific background and rationale for the investigation being reported                                                                                                       | Introduction contains rationale for protocol (explicit reporting of the systematic approach used to classify and select eligible records from the POLAR database will facilitate replication and transparency) |                                                                                                                                                                                                                                                                                                                                                                                                                                             |                                                                                                                                                                              |
| Objectives                | 3        | State specific objectives, including any prespecified hypotheses                                                                                                                           | Objectives<br>No prespecified hypotheses reported as this is a protocol                                                                                                                                        |                                                                                                                                                                                                                                                                                                                                                                                                                                             |                                                                                                                                                                              |
| <b>Methods</b>            |          |                                                                                                                                                                                            |                                                                                                                                                                                                                |                                                                                                                                                                                                                                                                                                                                                                                                                                             |                                                                                                                                                                              |
| Study Design              | 4        | Present key elements of study design early in the paper                                                                                                                                    | Study design section of Methods (retrospective cohort study)                                                                                                                                                   |                                                                                                                                                                                                                                                                                                                                                                                                                                             |                                                                                                                                                                              |
| Setting                   | 5        | Describe the setting, locations, and relevant dates, including periods of recruitment, exposure, follow-up, and data collection                                                            | Setting section of Methods includes locations of practices with POLAR database, dates of the study period (exposure and data collection) and follow-up                                                         |                                                                                                                                                                                                                                                                                                                                                                                                                                             |                                                                                                                                                                              |

|                           |    |                                                                                                                                                                                                                                                                                                                                                                                                                                                                                                                                                                                                                                                                                                                              |                                                                                                                                                                                                                                |                                                                                                                                                                                                                                                                                                                                                                                                                                                                                                                                                                                                                                                                                                      |                                                                                                                         |
|---------------------------|----|------------------------------------------------------------------------------------------------------------------------------------------------------------------------------------------------------------------------------------------------------------------------------------------------------------------------------------------------------------------------------------------------------------------------------------------------------------------------------------------------------------------------------------------------------------------------------------------------------------------------------------------------------------------------------------------------------------------------------|--------------------------------------------------------------------------------------------------------------------------------------------------------------------------------------------------------------------------------|------------------------------------------------------------------------------------------------------------------------------------------------------------------------------------------------------------------------------------------------------------------------------------------------------------------------------------------------------------------------------------------------------------------------------------------------------------------------------------------------------------------------------------------------------------------------------------------------------------------------------------------------------------------------------------------------------|-------------------------------------------------------------------------------------------------------------------------|
| Participants              | 6  | <p>(a) <i>Cohort study</i> - Give the eligibility criteria, and the sources and methods of selection of participants. Describe methods of follow-up</p> <p><i>Case-control study</i> - Give the eligibility criteria, and the sources and methods of case ascertainment and control selection. Give the rationale for the choice of cases and controls</p> <p><i>Cross-sectional study</i> - Give the eligibility criteria, and the sources and methods of selection of participants</p> <p>(b) <i>Cohort study</i> - For matched studies, give matching criteria and number of exposed and unexposed</p> <p><i>Case-control study</i> - For matched studies, give matching criteria and the number of controls per case</p> | <p>Eligibility criteria are presented in Table 2. Sources and methods of selection are described in Variables section of Methods.</p> <p>Setting – patient-level follow-up data until 31/12/18 will be included</p> <p>N/A</p> | <p>RECORD 6.1: The methods of study population selection (such as codes or algorithms used to identify subjects) should be listed in detail. If this is not possible, an explanation should be provided.</p> <p>RECORD 6.2: Any validation studies of the codes or algorithms used to select the population should be referenced. If validation was conducted for this study and not published elsewhere, detailed methods and results should be provided.</p> <p>RECORD 6.3: If the study involved linkage of databases, consider use of a flow diagram or other graphical display to demonstrate the data linkage process, including the number of individuals with linked data at each stage.</p> | <p>Variables section of Methods</p> <p>Diagnoses and imaging records within Variables section of Methods</p> <p>N/A</p> |
| Variables                 | 7  | Clearly define all outcomes, exposures, predictors, potential confounders, and effect modifiers. Give diagnostic criteria, if applicable.                                                                                                                                                                                                                                                                                                                                                                                                                                                                                                                                                                                    | Variables section of Methods and Tables 3, 4 & 5                                                                                                                                                                               | RECORD 7.1: A complete list of codes and algorithms used to classify exposures, outcomes, confounders, and effect modifiers should be provided. If these cannot be reported, an explanation should be provided.                                                                                                                                                                                                                                                                                                                                                                                                                                                                                      | Variables section of Methods and Tables 3, 4 & 5                                                                        |
| Data sources/ measurement | 8  | For each variable of interest, give sources of data and details of methods of assessment (measurement). Describe comparability of assessment methods if there is more than one group                                                                                                                                                                                                                                                                                                                                                                                                                                                                                                                                         | Data source section of Methods                                                                                                                                                                                                 |                                                                                                                                                                                                                                                                                                                                                                                                                                                                                                                                                                                                                                                                                                      |                                                                                                                         |
| Bias                      | 9  | Describe any efforts to address potential sources of bias                                                                                                                                                                                                                                                                                                                                                                                                                                                                                                                                                                                                                                                                    | Variables and data cleaning sections of Methods                                                                                                                                                                                |                                                                                                                                                                                                                                                                                                                                                                                                                                                                                                                                                                                                                                                                                                      |                                                                                                                         |
| Study size                | 10 | Explain how the study size was arrived at                                                                                                                                                                                                                                                                                                                                                                                                                                                                                                                                                                                                                                                                                    | Sample size consideration                                                                                                                                                                                                      |                                                                                                                                                                                                                                                                                                                                                                                                                                                                                                                                                                                                                                                                                                      |                                                                                                                         |
| Quantitative variables    | 11 | Explain how quantitative variables were handled in the analyses. If applicable, describe which groupings were chosen, and why                                                                                                                                                                                                                                                                                                                                                                                                                                                                                                                                                                                                | Analyses section of Methods                                                                                                                                                                                                    |                                                                                                                                                                                                                                                                                                                                                                                                                                                                                                                                                                                                                                                                                                      |                                                                                                                         |
| Statistical methods       | 12 | (a) Describe all statistical methods, including those used to control for confounding                                                                                                                                                                                                                                                                                                                                                                                                                                                                                                                                                                                                                                        | <p>a) Analyses section of Methods</p> <p>b) N/A</p>                                                                                                                                                                            |                                                                                                                                                                                                                                                                                                                                                                                                                                                                                                                                                                                                                                                                                                      |                                                                                                                         |

|                                  |    |                                                                                                                                                                                                                                                                                                                                                                                                                                                                             |                                                                                                                                                                                                                                                                                                                                                                                                                                                     |                                                                                                                                                                                                                                                                                                                    |                                                                          |
|----------------------------------|----|-----------------------------------------------------------------------------------------------------------------------------------------------------------------------------------------------------------------------------------------------------------------------------------------------------------------------------------------------------------------------------------------------------------------------------------------------------------------------------|-----------------------------------------------------------------------------------------------------------------------------------------------------------------------------------------------------------------------------------------------------------------------------------------------------------------------------------------------------------------------------------------------------------------------------------------------------|--------------------------------------------------------------------------------------------------------------------------------------------------------------------------------------------------------------------------------------------------------------------------------------------------------------------|--------------------------------------------------------------------------|
|                                  |    | (b) Describe any methods used to examine subgroups and interactions<br>(c) Explain how missing data were addressed<br>(d) <i>Cohort study</i> - If applicable, explain how loss to follow-up was addressed<br><i>Case-control study</i> - If applicable, explain how matching of cases and controls was addressed<br><i>Cross-sectional study</i> - If applicable, describe analytical methods taking account of sampling strategy<br>(e) Describe any sensitivity analyses | c) Approach to dataset creation<br>d) Data access and cleaning – only data after which there has been consistent reporting within a practice will be included<br>e) Analyses – sensitivity analysis to include entire follow-up period (instead of 1 year) for each participant and based on date of most recent diagnosis instead of index diagnosis for participants with multiple body regions affected by an eligible musculoskeletal diagnosis |                                                                                                                                                                                                                                                                                                                    |                                                                          |
| Data access and cleaning methods |    | ..                                                                                                                                                                                                                                                                                                                                                                                                                                                                          |                                                                                                                                                                                                                                                                                                                                                                                                                                                     | RECORD 12.1: Authors should describe the extent to which the investigators had access to the database population used to create the study population.<br><br>RECORD 12.2: Authors should provide information on the data cleaning methods used in the study.                                                       | Data access and cleaning methods<br><br>Data access and cleaning methods |
| Linkage                          |    | ..                                                                                                                                                                                                                                                                                                                                                                                                                                                                          |                                                                                                                                                                                                                                                                                                                                                                                                                                                     | RECORD 12.3: State whether the study included person-level, institutional-level, or other data linkage across two or more databases. The methods of linkage and methods of linkage quality evaluation should be provided.                                                                                          | N/A                                                                      |
| <b>Results</b>                   |    |                                                                                                                                                                                                                                                                                                                                                                                                                                                                             |                                                                                                                                                                                                                                                                                                                                                                                                                                                     |                                                                                                                                                                                                                                                                                                                    |                                                                          |
| Participants                     | 13 | (a) Report the numbers of individuals at each stage of the study ( <i>e.g.</i> , numbers potentially eligible, examined for eligibility, confirmed eligible, included in the study, completing follow-up, and analysed)<br>(b) Give reasons for non-participation at each stage.<br>(c) Consider use of a flow diagram                                                                                                                                                      | N/A                                                                                                                                                                                                                                                                                                                                                                                                                                                 | RECORD 13.1: Describe in detail the selection of the persons included in the study ( <i>i.e.</i> , study population selection) including filtering based on data quality, data availability and linkage. The selection of included persons can be described in the text and/or by means of the study flow diagram. | N/A                                                                      |
| Descriptive data                 | 14 | (a) Give characteristics of study participants ( <i>e.g.</i> , demographic, clinical, social) and information on                                                                                                                                                                                                                                                                                                                                                            | N/A                                                                                                                                                                                                                                                                                                                                                                                                                                                 |                                                                                                                                                                                                                                                                                                                    |                                                                          |

|                   |    |                                                                                                                                                                                                                                                                                                                                                                                                                                |            |                                                                                                                                                                                                                                                                                                          |            |
|-------------------|----|--------------------------------------------------------------------------------------------------------------------------------------------------------------------------------------------------------------------------------------------------------------------------------------------------------------------------------------------------------------------------------------------------------------------------------|------------|----------------------------------------------------------------------------------------------------------------------------------------------------------------------------------------------------------------------------------------------------------------------------------------------------------|------------|
|                   |    | <p>exposures and potential confounders</p> <p>(b) Indicate the number of participants with missing data for each variable of interest</p> <p>(c) <i>Cohort study</i> - summarise follow-up time (e.g., average and total amount)</p>                                                                                                                                                                                           |            |                                                                                                                                                                                                                                                                                                          |            |
| Outcome data      | 15 | <p><i>Cohort study</i> - Report numbers of outcome events or summary measures over time</p> <p><i>Case-control study</i> - Report numbers in each exposure category, or summary measures of exposure</p> <p><i>Cross-sectional study</i> - Report numbers of outcome events or summary measures</p>                                                                                                                            | N/A        |                                                                                                                                                                                                                                                                                                          |            |
| Main results      | 16 | <p>(a) Give unadjusted estimates and, if applicable, confounder-adjusted estimates and their precision (e.g., 95% confidence interval). Make clear which confounders were adjusted for and why they were included</p> <p>(b) Report category boundaries when continuous variables were categorized</p> <p>(c) If relevant, consider translating estimates of relative risk into absolute risk for a meaningful time period</p> | N/A        |                                                                                                                                                                                                                                                                                                          |            |
| Other analyses    | 17 | Report other analyses done—e.g., analyses of subgroups and interactions, and sensitivity analyses                                                                                                                                                                                                                                                                                                                              | N/A        |                                                                                                                                                                                                                                                                                                          |            |
| <b>Discussion</b> |    |                                                                                                                                                                                                                                                                                                                                                                                                                                |            |                                                                                                                                                                                                                                                                                                          |            |
| Key results       | 18 | Summarise key results with reference to study objectives                                                                                                                                                                                                                                                                                                                                                                       | N/A        |                                                                                                                                                                                                                                                                                                          |            |
| Limitations       | 19 | Discuss limitations of the study, taking into account sources of potential bias or imprecision. Discuss both direction and magnitude of any potential bias                                                                                                                                                                                                                                                                     | Discussion | RECORD 19.1: Discuss the implications of using data that were not created or collected to answer the specific research question(s). Include discussion of misclassification bias, unmeasured confounding, missing data, and changing eligibility over time, as they pertain to the study being reported. | Discussion |

|                            |                                                           |    |                                                                                                                                                                            |                                                                                                                           |                                                                                                                                                          |                                                                    |
|----------------------------|-----------------------------------------------------------|----|----------------------------------------------------------------------------------------------------------------------------------------------------------------------------|---------------------------------------------------------------------------------------------------------------------------|----------------------------------------------------------------------------------------------------------------------------------------------------------|--------------------------------------------------------------------|
| 1<br>2<br>3<br>4           | Interpretation                                            | 20 | Give a cautious overall interpretation of results considering objectives, limitations, multiplicity of analyses, results from similar studies, and other relevant evidence | N/A                                                                                                                       |                                                                                                                                                          |                                                                    |
| 5<br>6<br>7<br>8<br>9      | Generalisability                                          | 21 | Discuss the generalisability (external validity) of the study results                                                                                                      | Discussion – potential representativeness of the POLAR database and generalizability to the wider population is discussed |                                                                                                                                                          |                                                                    |
| 10                         | <b>Other Information</b>                                  |    |                                                                                                                                                                            |                                                                                                                           |                                                                                                                                                          |                                                                    |
| 11<br>12<br>13<br>14<br>15 | Funding                                                   | 22 | Give the source of funding and the role of the funders for the present study and, if applicable, for the original study on which the present article is based              | Funding statement                                                                                                         |                                                                                                                                                          |                                                                    |
| 16<br>17<br>18<br>19<br>20 | Accessibility of protocol, raw data, and programming code |    | ..                                                                                                                                                                         |                                                                                                                           | RECORD 22.1: Authors should provide information on how to access any supplemental information such as the study protocol, raw data, or programming code. | Appendix 1 – initial string match terms used to code imaging tests |

\*Reference: Benchimol EI, Smeeth L, Guttman A, Harron K, Moher D, Petersen I, Sørensen HT, von Elm E, Langan SM, the RECORD Working Committee. The REporting of studies Conducted using Observational Routinely-collected health Data (RECORD) Statement. *PLoS Medicine* 2015; in press.

\*Checklist is protected under Creative Commons Attribution ([CC BY](https://creativecommons.org/licenses/by/4.0/)) license.



# BMJ Open

**Patterns of care for people presenting to Australian general practice with musculoskeletal complaints based upon routinely collected data: Protocol for an observational cohort study using the Population Level Analysis and Reporting (POLAR) database**

|                                 |                                                                                                                                                                                                                                                                                                                                                                                                                                                                                                                                                                                                                                                                                                                                                                                                                                                                                                                                                                               |
|---------------------------------|-------------------------------------------------------------------------------------------------------------------------------------------------------------------------------------------------------------------------------------------------------------------------------------------------------------------------------------------------------------------------------------------------------------------------------------------------------------------------------------------------------------------------------------------------------------------------------------------------------------------------------------------------------------------------------------------------------------------------------------------------------------------------------------------------------------------------------------------------------------------------------------------------------------------------------------------------------------------------------|
| Journal:                        | <i>BMJ Open</i>                                                                                                                                                                                                                                                                                                                                                                                                                                                                                                                                                                                                                                                                                                                                                                                                                                                                                                                                                               |
| Manuscript ID                   | bmjopen-2021-055528.R1                                                                                                                                                                                                                                                                                                                                                                                                                                                                                                                                                                                                                                                                                                                                                                                                                                                                                                                                                        |
| Article Type:                   | Protocol                                                                                                                                                                                                                                                                                                                                                                                                                                                                                                                                                                                                                                                                                                                                                                                                                                                                                                                                                                      |
| Date Submitted by the Author:   | 06-Sep-2021                                                                                                                                                                                                                                                                                                                                                                                                                                                                                                                                                                                                                                                                                                                                                                                                                                                                                                                                                                   |
| Complete List of Authors:       | Haas, Romi; Cabrini Health, Monash-Cabrini Department of Musculoskeletal Health and Clinical Epidemiology; Monash University, Department of Epidemiology and Preventive Medicine<br>Busija, Ljoudmila; Monash University, Department of Epidemiology and Preventive Medicine<br>Gorelik, Alexandra; Cabrini Health, Monash-Cabrini Department of Musculoskeletal Health and Clinical Epidemiology; Monash University, Department of Epidemiology and Preventive Medicine<br>O'Connor, Denise; Cabrini Health, Monash-Cabrini Department of Musculoskeletal Health and Clinical Epidemiology; Monash University, Department of Epidemiology and Preventive Medicine<br>Pearce, Christopher; Outcome Health<br>Mazza, Danielle; Monash University, Department of General Practice<br>Buchbinder, Rachelle; Cabrini Health, Monash-Cabrini Department of Musculoskeletal Health and Clinical Epidemiology; Monash University, Department of Epidemiology and Preventive Medicine |
| <b>Primary Subject Heading</b>: | General practice / Family practice                                                                                                                                                                                                                                                                                                                                                                                                                                                                                                                                                                                                                                                                                                                                                                                                                                                                                                                                            |
| Secondary Subject Heading:      | Rheumatology                                                                                                                                                                                                                                                                                                                                                                                                                                                                                                                                                                                                                                                                                                                                                                                                                                                                                                                                                                  |
| Keywords:                       | PRIMARY CARE, Musculoskeletal disorders < ORTHOPAEDIC & TRAUMA SURGERY, Back pain < ORTHOPAEDIC & TRAUMA SURGERY, Shoulder < ORTHOPAEDIC & TRAUMA SURGERY, Knee < ORTHOPAEDIC & TRAUMA SURGERY, EPIDEMIOLOGY                                                                                                                                                                                                                                                                                                                                                                                                                                                                                                                                                                                                                                                                                                                                                                  |
|                                 |                                                                                                                                                                                                                                                                                                                                                                                                                                                                                                                                                                                                                                                                                                                                                                                                                                                                                                                                                                               |

SCHOLARONE™  
Manuscripts



I, the Submitting Author has the right to grant and does grant on behalf of all authors of the Work (as defined in the below author licence), an exclusive licence and/or a non-exclusive licence for contributions from authors who are: i) UK Crown employees; ii) where BMJ has agreed a CC-BY licence shall apply, and/or iii) in accordance with the terms applicable for US Federal Government officers or employees acting as part of their official duties; on a worldwide, perpetual, irrevocable, royalty-free basis to BMJ Publishing Group Ltd ("BMJ") its licensees and where the relevant Journal is co-owned by BMJ to the co-owners of the Journal, to publish the Work in this journal and any other BMJ products and to exploit all rights, as set out in our [licence](#).

The Submitting Author accepts and understands that any supply made under these terms is made by BMJ to the Submitting Author unless you are acting as an employee on behalf of your employer or a postgraduate student of an affiliated institution which is paying any applicable article publishing charge ("APC") for Open Access articles. Where the Submitting Author wishes to make the Work available on an Open Access basis (and intends to pay the relevant APC), the terms of reuse of such Open Access shall be governed by a Creative Commons licence – details of these licences and which [Creative Commons](#) licence will apply to this Work are set out in our licence referred to above.

Other than as permitted in any relevant BMJ Author's Self Archiving Policies, I confirm this Work has not been accepted for publication elsewhere, is not being considered for publication elsewhere and does not duplicate material already published. I confirm all authors consent to publication of this Work and authorise the granting of this licence.

1  
2  
3 **Patterns of care for people presenting to Australian general practice with**  
4 **musculoskeletal complaints based upon routinely collected data: Protocol for an**  
5 **observational cohort study using the Population Level Analysis and Reporting**  
6 **(POLAR) database**  
7  
8  
9

10 Romi Haas ([romi.haas@monash.edu](mailto:romi.haas@monash.edu))<sup>1,2\*</sup>, Ljoudmila Busija ([lucy.busija@monash.edu](mailto:lucy.busija@monash.edu))<sup>2</sup>,  
11 Alexandra Gorelik ([Alexandra.gorelik@monash.edu](mailto:Alexandra.gorelik@monash.edu))<sup>1,2</sup>, Denise O'Connor  
12 ([denise.oconnor@monash.edu](mailto:denise.oconnor@monash.edu))<sup>1,2</sup>, Christopher Pearce ([drchrispearce@mac.com](mailto:drchrispearce@mac.com))<sup>3</sup>, Danielle  
13 Mazza ([danielle.mazza@monash.edu](mailto:danielle.mazza@monash.edu))<sup>4</sup>, Rachele Buchbinder  
14 ([rachele.buchbinder@monash.edu](mailto:rachele.buchbinder@monash.edu))<sup>1,2</sup>  
15  
16

17  
18 <sup>1</sup> Monash-Cabrini Department of Musculoskeletal Health and Clinical Epidemiology, Cabrini  
19 Health, Malvern, Victoria, Australia.

20 <sup>2</sup> Department of Epidemiology and Preventive Medicine, School of Public Health and  
21 Preventive Medicine, Monash University, Melbourne, Victoria, Australia.

22 <sup>3</sup> Outcome Health, Blackburn, Victoria, Australia.

23 <sup>4</sup> Department of General Practice, Monash University, Notting Hill, Victoria, Australia.

24 \* Corresponding author  
25  
26

## 27 Correspondence

28  
29 Romi Haas  
30 Monash-Cabrini Department of Musculoskeletal Health and Clinical Epidemiology, Cabrini  
31 Institute  
32 154 Wattletree Rd, Malvern  
33 Victoria 3144  
34 Australia  
35 Email: [romi.haas@monash.edu](mailto:romi.haas@monash.edu)  
36 Telephone: +61 3 9508 3499  
37  
38

## 39 Keywords

40 Protocol  
41 Primary care  
42 Musculoskeletal disorders  
43 Low back pain  
44 Neck pain  
45 Shoulder pain  
46 Knee pain  
47  
48

## 49 ABSTRACT

### 51 Introduction

52  
53 General practice is integral to the Australian healthcare system. Outcome Health's  
54 Population Level Analysis and Reporting (POLAR) database uses de-identified electronic  
55 health records to analyse general practice data in Australia. Previous studies using routinely  
56 collected health data for research have not consistently reported the codes and algorithms  
57 used to describe the population, exposures, interventions and outcomes in sufficient detail to  
58 allow replication. This paper reports a study protocol investigating patterns of care for people  
59  
60

1  
2  
3 presenting with musculoskeletal conditions to general practice in Victoria, Australia. Its focus  
4 is on the systematic approach used to classify and select eligible records from the POLAR  
5 database to facilitate replication. This will be useful for other researchers using routinely  
6 collected health data for research.  
7  
8

## 9 **Methods and analysis**

11 This is a retrospective cohort study. Patient-related data will be obtained through electronic  
12 health records from a subset of general practices across three primary health networks (PHN)  
13 in South Eastern Victoria. Data for patients with a low back, neck, shoulder and/or knee  
14 condition and who received at least one GP face-to-face consultation between 1/01/2014 and  
15 31/12/2018 will be included. Data quality checks will be conducted to exclude patients with  
16 poor data recording and/or non-continuous follow-up. Relational data files with eligible and  
17 valid records will be merged to select the study cohort and the GP care received  
18 (consultations, imaging requests, prescriptions and referrals) between diagnosis and  
19 31/12/2018. Number and characteristics of patients and GPs, and number, type and timing of  
20 imaging requests, prescriptions for pain relief and referrals to other health providers will be  
21 investigated.  
22  
23  
24  
25

## 26 **Ethics and dissemination**

27  
28 Ethics approval was obtained from the Cabrini and Monash University Human Research Ethics  
29 Committees (Reference Numbers 02-21-01-19 and 16975 respectively). Study findings will be  
30 reported to Outcome Health, participating PHNs, disseminated in academic journals and  
31 presented in conferences.  
32  
33

## 34 **ARTICLE SUMMARY**

### 35 **Strengths and limitations of this study**

- 36 • This is the first study to our knowledge to report the codes and algorithms used to classify,  
37 select and merge eligible records from the POLAR database into a patient-centred database  
38 to facilitate analysis of general practice patterns of care.
- 39 • The systematic approach used in this study can be adapted by other researchers using  
40 routinely collected health data for research purposes.
- 41 • This study will extend previous research that has assessed the representativeness of  
42 POLAR data to GP care across the wider Australian population.
- 43 • These data are likely to underestimate actual allied health visits as some of these do not  
44 require a GP referral in Australia; some prescriptions for pain relief are available without a  
45 prescription so these data will also be underestimated.
- 46 • It is possible not all patterns of care for the study cohort will be directly attributable to a  
47 musculoskeletal condition as reasons for GP consultations, referrals, and prescriptions are  
48 not mandated by the source Electronic Medical Records (EMRs).  
49  
50  
51  
52  
53  
54  
55  
56  
57  
58  
59  
60

## INTRODUCTION

General practice plays an essential role in providing primary health care to the population. In Australia 86% of the population visits a general practitioner (GP) multiple times a year<sup>1</sup>, and nearly 20% of these consultations are for a musculoskeletal condition<sup>2</sup>. These conditions account for 23% of the years lived with disability in Australia<sup>3</sup> and are also a major cause of disability worldwide<sup>4</sup>. Until 2016, the BEACH (Bettering the Evaluation and Care of Health) program provided the most comprehensive data on clinical activities of Australian general practice<sup>5</sup>. The program identified a number of activities that represent low-value care for people with musculoskeletal conditions including an over-reliance on imaging, prescription of opioids, and unnecessary referrals to specialist care<sup>6,7</sup>. However, in-depth exploration of these activities within the BEACH program is limited by its cross-sectional design, and these data are no longer being collected.

Technological advancements have facilitated the extraction of de-identified patient information from general practice clinical information systems. The advantage of these datasets for research purposes are that they are longitudinal and can therefore be used to establish sequences of events at the patient level and to examine changes in GP management over time. Both the Medicine Insight<sup>8</sup> and the Population Level Analysis and Reporting (POLAR) databases<sup>9</sup> are examples of longitudinal general practice datasets within Australia. Unlike POLAR, the Medicine Insight program does not currently include referrals provided by GPs to other healthcare providers<sup>8</sup>. These data may provide important insights into how well GPs are playing their role as gatekeepers of the Australian healthcare system.

While using routinely collected data for research purposes offers considerable opportunities to improve health care, there are several challenges to be overcome. Differences in patient information management and data extraction tools result in variability in both the information captured and ways in which this information is coded. In particular, the way in which text values (diagnoses, examination findings, test results and medications) are transformed to codes can be a source of variation within and between studies. Previous studies have highlighted how code selection affects the reported prevalence and precision of results<sup>10</sup>. Studies conducted using routinely collected health data should therefore be reported with sufficient detail and clarity to allow replication. However, a systematic evaluation of a random sample of 124 publications using routinely collected health data has demonstrated inadequate reporting of the methods used<sup>11</sup>. For example, in 44 studies where definitions of codes or classification algorithms were deemed necessary to describe the population, exposures or interventions and outcomes, only nine (20.5%) reported all three items adequately. The REporting of studies Conducted using Observational Routinely collected Data (RECORD) guidelines, published in 2015, were developed to assist in this process and to ensure that readers can assess the internal and external validity of the findings of these studies<sup>12</sup>.

The POLAR database draws data from every consultation occurring for millions of patients in approximately 30% of general practices across South-Eastern Victoria<sup>13</sup>, an area that comprises more than half of Victoria's population<sup>14</sup>. Inclusion is based on practice consent so this volume is increasing exponentially as more practices consent to add their data and as more consultations occur over time. Unlike in other countries, coding is not embedded in the clinical process and needs to be conducted specifically for research purposes. Data are provided to research users in a relational database that organises data into files that can be merged based on common data fields. Identifying and selecting relevant records and merging separate files

1  
2  
3 into a patient-centred database for analysis is a complex task that could potentially yield  
4 variable results depending on the methods used.  
5

6  
7 Previous studies have used the POLAR database to investigate patterns of antimicrobial  
8 prescribing for children<sup>15</sup>, to examine characteristics of patients presenting to an after-hours  
9 clinic<sup>16</sup>, to estimate GP recording of cardiovascular risk factors<sup>17</sup>, and to describe  
10 characteristics of pathology test ordering in general practice<sup>18</sup>. However, these studies have not  
11 reported the methods used to classify and select eligible records or the processes used to merge  
12 data files into a patient-centred database for analysis.  
13

14  
15 This manuscript presents a protocol for a study investigating patterns of GP care for people  
16 with a low back, neck, shoulder and/or knee condition in Victoria, Australia. It describes the  
17 methods used to classify and select eligible records from the POLAR database and how  
18 relational data files will be merged into a patient-centred database. This systematic approach  
19 will guide future research by enabling researchers interested in using routinely collected health  
20 data, and the POLAR database in particular, to answer other clinically relevant questions about  
21 general practice care. Study findings will advance existing knowledge about GP care for people  
22 with these musculoskeletal conditions and whether it conforms to best evidence-based practice.  
23 Differences in care across different musculoskeletal complaints may also inform tailored  
24 interventions to improve care and ultimately reduce the burden of disease associated with these  
25 musculoskeletal complaints.  
26  
27  
28  
29

### 30 **Objectives**

31 The aim of this study will be to examine GP patterns of care for people with low back, neck,  
32 shoulder and knee conditions. Specific objectives will be to:

- 33 1. Describe and compare the management (number, type and timing of imaging tests and  
34 procedure requests, prescriptions for pain relief, and referrals to other health providers)  
35 provided by GPs to people with low back, neck, shoulder and knee conditions
- 36 2. Describe the prevalence of comorbidities among specific musculoskeletal diagnoses within  
37 this cohort
- 38 3. Examine the association between management types and patient- and practice-related  
39 variables
- 40 4. Examine the longitudinal changes in GP management for these conditions between 2014  
41 and 2018 inclusive  
42  
43  
44

## 45 **METHODS**

### 46 **Study design**

47 A retrospective cohort study using general practice health records from Victoria, Australia.  
48  
49

### 50 **Data source**

51 This study will use data from Outcome Health's POLAR database<sup>9</sup>. The database structure is  
52 based on eight relational files, each containing de-identified practice, provider, and/or patient  
53 codes (Figure 1). These common fields allow merging of the data files so that databases can be  
54 configured for specific research purposes. Data is extracted from two different clinical  
55 information systems, covering ninety percent of included general practices. All data is  
56 extracted using the Hummingbird data extraction tool<sup>9</sup>.  
57  
58  
59  
60



## Setting

The POLAR database contains de-identified patient-related data from all electronic medical records of consenting general practices within the PHNs of Eastern Melbourne, South Eastern Melbourne and Gippsland within Victoria, Australia. Our study will include data collected over five calendar years from 1 January 2014 until 31 December 2018 relating to all patients with an eligible musculoskeletal condition and who received at least one face-to-face GP consultation. Follow up will be from the time of the initial recorded diagnosis to 31<sup>st</sup> December 2018. Data analyses will be completed by the end of 2021.

## Participants

The study cohort will include people diagnosed during 2014 to 2018 inclusive with a low back, neck, shoulder and/or knee condition, limited to age 45 years and over except for low back which will be limited to age 18 years and over. The differing age restrictions were chosen because the prevalence of most musculoskeletal conditions increases markedly after the age of 45 except for low back pain which increases after the age of 18<sup>19</sup>. Eligibility criteria are presented (Table 1). We excluded traumatic diagnoses and conditions typically primarily managed by a specialist (e.g., inflammatory and autoimmune rheumatic diseases). Patients with an eligible diagnosis and age will also have received at least one GP face-to-face consultation during the study dates. The musculoskeletal diagnosis will not have to occur during a GP consultation since it is an eligible diagnosis that could result from consultation with other health care providers.

## Variables

Preparatory work to classify and select eligible records has been completed as part of the protocol process. In circumstances where Outcome Health has previously coded data (e.g., diagnosis records), we used this coding to select eligible records that fitted our inclusion criteria. In circumstances where there was no coding (e.g., imaging tests), we coded the data into categories and then selected eligible records. Outcome Health's approach to coding used clinical natural language processing to automatically code structured narrative text within the electronic medical record following by a manual process for quality checking and correction<sup>20</sup>. For example, this allowed the free text items 'back pain', 'low back pain', and 'lumbar pain' to all sit under the same diagnostic code. Where possible, coding was conducted using a standardised classification system. For example, diagnoses are coded using SNOMED CT-AU terminology<sup>21</sup> and prescriptions are coded according to the Anatomical Therapeutic Chemical (ATC) classification system<sup>22</sup>. In cases where there is no standardised classification system available (e.g., providers and referrals), Outcome Health used a similar process to code these variables into relevant categories (e.g., type of health care provider). Clinical natural language processing conducted by Outcome Health has previously demonstrated accurate coding of over 95% of the narrative text to SNOMED CT-AU terms in a sample of approximately 57,000 diagnosis records<sup>20</sup>. Our approaches to coding and/or selecting eligible records for each variable are described in detail below.

### Provider records

Healthcare providers other than a GP may be nested within a general practice. To limit all diagnoses, consultations, referrals, and prescriptions to those made only by GPs we used coding within the provider type field conducted by Outcome Health. This is coded by Outcome Health



1  
2  
3 according to the professional background of the healthcare provider delivering the service (e.g.,  
4 GP, nurse).  
5

### 6 Diagnoses records

7  
8  
9 All SNOMED CT-AU diagnosis-related terms used during 2014-2018 were searched by two  
10 study authors (RH and RB) to select eligible low back, neck, shoulder and knee conditions. We  
11 included all patients with an eligible musculoskeletal diagnosis during 2014-2018 regardless  
12 of whether they had a prior musculoskeletal diagnosis. Included SNOMED diagnosis terms are  
13 presented (Table 2). Sacral conditions were included as part of low back conditions. The  
14 following SNOMED terms were excluded as these conditions were deemed to be indicative of  
15 traumatic injury or conditions that are not managed primarily by GPs: fracture (except lumbar  
16 and tibial plateau fractures), dislocation, synovectomies/synovitis, and cauda equina syndrome.  
17 Knee ligamentous and meniscal tears were included as these are likely due to degeneration in  
18 the 45 years and over age group<sup>23</sup>. Lesions were excluded as these could involve a wound, ulcer  
19 or tumour and are not musculoskeletal conditions. General musculoskeletal terms such as  
20 sprain or osteoarthritis (where the site was not specified) were also excluded as these could not  
21 be attributed to a specific body region. We included relevant surgical or procedural  
22 musculoskeletal terms as GPs are involved in referral and follow-up for these conditions.  
23  
24  
25  
26

27 Using experienced clinicians, Outcome Health has further categorised SNOMED diagnoses  
28 into overarching groups and utilised key chronic disease groups as a qualifier<sup>9</sup>. For example,  
29 free text such as 'low back pain' or 'angina' could be qualified as a chronic disease if present  
30 for six months or more. We used these chronic disease groups to identify eligible comorbid  
31 diagnoses for our study cohort as follows: chronic cardiovascular disease, chronic obstructive  
32 pulmonary disease, chronic musculoskeletal conditions, cancer, opioid addiction, dementia,  
33 diabetes, depression/anxiety, and obesity. Obesity was identified using SNOMED terms as it  
34 was not coded as a chronic disease category in the POLAR database. We included previous  
35 chronic musculoskeletal conditions so that these could be investigated as a potential predictor  
36 of different management patterns.  
37  
38

### 39 Activity records

40  
41 Activity records are coded in POLAR according to the type of consultation provided (e.g.,  
42 telehealth, visit, telephone). Each time a note is recorded in the narrative section it is coded by  
43 the EMR and this is extracted by POLAR. We used this coding to select eligible patients who  
44 had at least one 'Activity type' relating to a face-to-face consultation (i.e., encounter, surgery  
45 or visit) during 2014-2018 inclusive. Telehealth and telephone consultations were also included  
46 for follow-up consultations only.  
47  
48

### 49 Referral records

50  
51 Referral records are coded in POLAR according to discipline (e.g., neurosurgeon,  
52 physiotherapist, endocrinologist). We used this coding to select eligible referral groups  
53 considered relevant to a person with low back, neck, shoulder or knee conditions. The  
54 following referral groups were included: orthopaedics and neurosurgery (surgical specialists);  
55 sports medicine, rheumatology, rehabilitation medicine, neurology, and pain management  
56 (non-surgical specialists); and physiotherapy, osteopathy, massage therapy, exercise  
57 physiology, chiropractor, and psychology (allied health providers).  
58  
59  
60

## Prescription records

Medications are coded in POLAR according to the Anatomic and Therapeutic Classifications (ATC) system<sup>22</sup>. We included medications deemed by the study authors to be commonly prescribed for pain relief to people with musculoskeletal conditions. Medications within the following categories were included: simple analgesics; non-steroidal anti-inflammatories (NSAIDs); chondroitin and/or glucosamine; topical products for joint and muscular pain; opioids; neuromodulators and any relevant combinations. We included neuromodulators such as gabapentin and pregabalin because these are being increasingly used for the management of musculoskeletal conditions such as nonspecific low back pain or sciatica despite evidence of a lack of effectiveness and a higher risk of adverse events<sup>24</sup>. Opioid analgesics were further categorised into (i) weak single ingredient opioid analgesics (e.g. codeine), defined as <50 morphine milligram equivalents (MME) per day; (ii) strong single ingredient opioid analgesics (e.g. tapentadol, oxycodone, morphine), defined as 150 MME per day; and (iii) combination opioid analgesics<sup>25</sup>. Medicines in the combination opioid category were categorised based on the strongest medicine present, either as a weak combination opioid or as a strong combination opioid.

To ensure we included all potentially eligible medication names, we searched by both ATC category and by medication name from the prescription file during 2014-2018. The medication names we included are presented in Table 3. We included oral, topical and injectable preparations of medications. We excluded the following prescriptions: aspirin, decongestants (e.g., pseudoephedrine), antihistamines (e.g., doxylamine), opioid cough suppressants (e.g., dextromethorphan), and expectorants (e.g., guaifenesin). These were excluded on the basis that they were likely to have been prescribed for another condition (e.g., aspirin for secondary prevention of cardiovascular disease<sup>26</sup>).

## Imaging records

The test data file within POLAR contains radiology and pathology tests requested by the GP. At the time of data extract, coding of the test data file had not been completed for specific imaging tests by Outcome Health and there were too many records to scan manually. We therefore exported all radiology test names during 2014-2018 inclusive and used an inductive coding process to select the following eligible imaging tests: plain radiographs, CT and MRI scans of the lumbar and cervical spine; plain radiographs, CT, MRI and ultrasounds of the knee; and plain radiographs, MRI scans and ultrasounds of the shoulder. We also included lumbar spine, knee, shoulder and cervical spine injections and shoulder hydrodilatation as eligible radiology procedures.

To code eligible imaging records, we first used the string match command in Stata to select all test names for each eligible anatomical region (i.e., low back, neck, shoulder and knee). Within each region, we then iteratively coded all imaging records into subgroups according to the type of imaging test (e.g., ultrasound). This process involved developing string match terms to identify each type of eligible radiology test or procedure within the sample, reviewing the uncoded test names (subgrouped as 'other') and manually coding additional terms until the remaining test names could not be classified into any further subgroups. We also developed string match terms to identify bilateral tests of the shoulder and knee. The initial string match terms used to code each body region and eligible imaging test or procedure are presented in Appendix 1.

1  
2  
3 During the coding process, there were numerous test names that did not definitively identify a  
4 type of imaging test (e.g., 'right knee'). We labelled these as 'unspecified'. We plan to classify  
5 these as plain radiographs in our analysis. This is because plain radiograph was deemed to be  
6 the default radiology modality in the Electronic Medical Record (EMR) software. The  
7 subgroups of imaging records inductively developed for each eligible body region are  
8 presented in Table 4. Our subgroup coding (excluding test names labelled as 'unspecified' and  
9 'other') accounted for 96%, 95.8%, 95.2% and 96.6% of the identified low back (n=180,630),  
10 neck (n=192,844), shoulder (n=236,803) and knee (n=235,123) imaging test names  
11 respectively.  
12  
13  
14

15 Test names indicating more than one imaging test were classified separately. We excluded  
16 imaging tests of soft tissues of the neck and test names indicating a combined neck image with  
17 the head, larynx, thyroid and/or abdomen (unless it specifically stated cervical spine) as we  
18 deemed these investigations were most likely not requested for a musculoskeletal condition.  
19 We also excluded test names with the following terms as these were not deemed to indicate an  
20 imaging test or procedure: 'report', 'findings', 'cancel', 'results', 'letter'.  
21  
22  
23

### 24 **Data access and cleaning**

25 Outcome Health provided the research team with access to all POLAR database records since  
26 inception (1997). Data quality checks will be performed to label data as 'acceptable' for  
27 analysis using a similar process to that conducted by an established general practice database  
28 in the United Kingdom<sup>27</sup>. Duplicate data and records with empty or implausible birth dates  
29 (defined as greater than 115 years of age at time of diagnosis or dated after patient  
30 management) will be excluded from analyses. We will exclude practices without any activity  
31 data during 2014-2018. We will also examine the consistency of activity, test, prescription,  
32 and referral data for each practice in each eligible calendar year. If a gap in reporting from  
33 any practice is identified for one year or more, only data from the earliest date after which  
34 there was no gap will be included. For example, if a practice has activity data in 2014, 2017  
35 and 2018, only data from 2017 onwards will be included. In addition, we will exclude activity  
36 records that represent more than one face-to-face consultation with a GP for the same patient  
37 on the same day. This is because an 'activity' occurs in POLAR anytime a patient record is  
38 accessed regardless of whether this was for clinical or administration purposes.  
39  
40  
41  
42  
43  
44

### 45 **Approach to dataset creation**

46 We will use a systematic process to systematically exclude ineligible records in order to  
47 merge data and select the study cohort (Figure 2). This process will require the merging of  
48 five relational data files (patient, practice, provider, activity and diagnosis) in a specific  
49 sequence to ensure all relevant records are retained. For example, we will not limit diagnosis  
50 records to 2014-2018 until after we have selected relevant comorbidities. A patient-centred  
51 database will be prepared to examine the number and type of GP consultations, imaging test  
52 and procedure requests, prescriptions for pain relief, and referrals to other health providers  
53 for our study cohort. Data that does not match our eligibility criteria (including data with  
54 missing fields) will be excluded during the merging process as unmatched records. Duplicate  
55 records, records with implausible dates or missing fields, and multiple records of the same  
56 type on a single day will also be removed and reported.  
57  
58  
59  
60

## Analyses

All relevant data will be extracted from the POLAR SQL database and imported into Stata 15 (STATA Corp LP, College Station, TX, USA) for data management and analyses. The methods in this protocol are structured according to RECORD guidelines (Appendix 2)<sup>12</sup>. Full lists of codes used to define eligible variables are available from <https://clinicalcodes.rss.mhs.man.ac.uk/medcodes/article/174/><sup>28</sup> where there is a recognised coding system.

Descriptive statistics will be used to summarise the study cohort including the number and type of eligible musculoskeletal conditions, patient demographics and comorbidities. These will be compared to national health survey data to assess the representativeness of the POLAR database to the wider Australian population. Eligible musculoskeletal conditions will be grouped according to body region.

Primary analysis will include analysis of each management type provided for each participant during the first year after their index diagnosis. A sensitivity analysis will be conducted including the entire follow-up period until 31<sup>st</sup> December 2018. For prescriptions, the primary analysis will include the entire follow-up period because repeated prescriptions over more than one year are anticipated. Descriptive statistics will also be used to summarise the number and type of GP all-cause consultations, imaging tests and procedures requested, prescriptions for pain relief, and referrals to other health providers for the study cohort. Results will be stratified by affected body region. Consultations will be categorised as face-to-face or telecommunication. Imaging requests will be categorised according to the type of imaging modality or procedure and body region (e.g., knee MRI). Bilateral knee and shoulder imaging requests will be counted as two imaging requests. Prescriptions will be categorised according to paracetamol, NSAIDs, glucosamine and/or chondroitin, opioids (weak single opioid, strong single opioid, weak combination opioid, and strong combination opioid) and neuromodulators. Referrals will be categorised according to surgical specialist, non-surgical specialist, and allied health. Patterns and timing of management (imaging requests, prescriptions and referrals) for people with eligible low back, neck, shoulder and knee conditions will be examined and compared between each year within the five-year study period and relative to time of diagnosis using trend analyses.

One of the limitations of the POLAR database is that it does not capture reasons for the clinical encounter or management types (imaging request, prescription or referral). To account for the subsequent uncertainty in attributing management types to a particular diagnosis for those with multiple musculoskeletal conditions, participants with eligible musculoskeletal diagnoses from multiple body regions will be analysed separately to those with eligible diagnoses in one body region. For participants with multiple eligible musculoskeletal diagnoses throughout the study period, the primary analysis will be conducted relative to the date of the first (index) eligible musculoskeletal diagnosis and a sensitivity analysis relative to the date of the most recent diagnosis will also be conducted. Imaging requests will be analysed relative to the date of the most recent musculoskeletal diagnosis for the same body region. For example, a shoulder ultrasound will be analysed

1  
2  
3 relative to the index date of an eligible shoulder diagnosis even if the same patient was  
4 diagnosed previously with an eligible knee condition.  
5  
6

7 The association between management types and patient- and practice-related characteristics  
8 will be examined using regression analysis. Predictors will include patient age, gender, body  
9 region(s) affected by eligible musculoskeletal conditions, socioeconomic status, remote or  
10 metropolitan location of GP practice, whether the patient lives within the Primary Health  
11 Network (PHN) of the practice, and time since diagnosis. Socioeconomic status will be  
12 defined by the Index of Relative Socioeconomic Advantage and Disadvantage (IRSAD)  
13 using 2016 Census data<sup>29</sup>.  
14  
15

16  
17 Sequence analysis will be used to categorise sequences of management types of people with  
18 eligible musculoskeletal conditions into similar groups based on observed characteristics<sup>30</sup>.  
19 This will take into account both the time since diagnosis and sequence of each management  
20 type. We will use this to identify the most frequently used combinations and sequences of  
21 management and the patient- and practice-related variables that correlate with each  
22 management combination.  
23  
24

### 25 **Sample size consideration**

26  
27 Sequence analysis will require the largest sample size of our planned analyses and will  
28 therefore form the basis of our sample size consideration. We plan to examine the following  
29 six management types: non-surgical referrals, surgical referrals, allied health referrals, opioid  
30 prescription, X-ray and/or ultrasound requests, and MRI and/or CT scan requests. This  
31 provides a total of 720 potential sequence combinations. Based on a recommended 20 to 30  
32 subjects per subgroup<sup>31</sup>, we estimate a sample size of between 14,400 and 21,600 will be  
33 required to differentiate between each sequence combination or pattern of care. Recent use of  
34 the POLAR database using data from approximately 200 general practices identified 20,514  
35 active adult patients with type 2 diabetes before July 2016<sup>32</sup>. Our extract is based on 301  
36 general practices from 2014 to 2018 and since the prevalence of diabetes is less than that of  
37 musculoskeletal conditions<sup>33</sup>, we expect a sample size of more than 20,000.  
38  
39  
40  
41  
42

### 43 **Patient and public involvement**

44  
45 There will be no involvement of patients or the public in this study.  
46  
47

## 48 **DISCUSSION**

49  
50 Explicitly reporting our systematic approach used to classify, select and merge eligible records  
51 from relational data files into a patient-centred database for analysis promotes transparency,  
52 reproducibility and completeness of the reporting of research conducted using routinely  
53 collected health data. The approach used to code eligible imaging tests from structured  
54 narrative text coded over 95% of the 845,400 cumulative imaging-related test and procedure  
55 records identified for low back, shoulder, knee and neck conditions during 2014-2018. Our  
56 code lists are available for all variables that have been previously coded by POLAR and those  
57 with a recognised coding system have been made available on the ClinicalCodes online  
58 repository. Although our coding process may only be applicable to systems that do not embed  
59  
60



coding in the clinical process, this approach can also be adapted to examine patterns of care over time for other conditions in general practice.

The main strength of this study is that it will facilitate an overview of the care provided by GPs to the same patient(s) over time and thereby enable temporal sequences to be examined. The POLAR database contains all patient-related activity within each practice making it representative of the included practices. Previous research has demonstrated comparable prevalence and age-gender distribution of people diagnosed with type 2 diabetes within the POLAR database to those within Australia<sup>32</sup>. This study will add to these findings by assessing the representativeness of people with musculoskeletal conditions within the POLAR database to the wider Australian population.

Constraints within the POLAR database may potentially limit the reliability of this study's findings although these are problems inherent in the use of any extracted data. Variability in workflows and recording behaviour introduces potential biases and the different clinical information systems used by the practices within POLAR may result in variability in the information entered. The objective of POLAR is to remove as much variability as possible by using and being transparent about the coding process. High accuracy of diagnostic coding by Outcome Health has been previously demonstrated<sup>20</sup>. In addition, it is possible not all patterns of care for the study cohort will be directly attributable to a musculoskeletal condition because reasons for GP consultations, referrals, and prescriptions are not mandated in the source EMRs. Prescriptions for some types of pain relief and referrals to allied health providers may also be underestimated by the POLAR database as these forms of management may be generated outside of general practice. These data are also likely to underestimate actual allied health visits and prescriptions for pain relief as some of these do not require a GP referral and are available over-the-counter without a prescription respectively in Australia.

## ETHICS AND DISSEMINATION

Prior approval to conduct this study was obtained from the Cabrini Human Research Ethics Committee and Monash University Human Research Ethics Committee (Reference Numbers 02-21-01-19 and 16975 respectively). We did not obtain participant consent as all data was anonymised. Outcome Health holds a standing ethics approval for its collection and custodianship of the data from the Royal Australian College of General Practice. The study findings will be reported to Outcome Health, participating PHNs, disseminated in peer-reviewed academic journals and presented in national and international conferences.

## FIGURES

Figure 1. Database structure

Figure 2. Approach to dataset creation

1  
2  
3  
4  
5  
6  
7  
8  
9  
10  
11  
12  
13  
14  
15  
16  
17  
18  
19  
20  
21  
22  
23  
24  
25  
26  
27  
28  
29  
30  
31  
32  
33  
34  
35  
36  
37  
38  
39  
40  
41  
42  
43  
44  
45  
46

For peer review only



Table 1. Eligibility Criteria

| Patient population                                                                                           |                                     |                                                                                              | Patient management         |                            |                                                                                                  |                                                                                                                         |                                                                                                                                                                                                                                                                                                                                                                     |
|--------------------------------------------------------------------------------------------------------------|-------------------------------------|----------------------------------------------------------------------------------------------|----------------------------|----------------------------|--------------------------------------------------------------------------------------------------|-------------------------------------------------------------------------------------------------------------------------|---------------------------------------------------------------------------------------------------------------------------------------------------------------------------------------------------------------------------------------------------------------------------------------------------------------------------------------------------------------------|
| Diagnoses                                                                                                    | Provider                            | Patient                                                                                      | Practice                   | Activity                   | Referrals                                                                                        | Prescriptions                                                                                                           | Imaging tests & procedures                                                                                                                                                                                                                                                                                                                                          |
| Low back<br>Knee<br>Shoulder<br>Neck<br><br><b>Exclude:</b><br>Trauma<br><br>Systemic inflammatory arthritis | Diagnosed by a general practitioner | Aged $\geq 18$ years for low back conditions<br>Aged $\geq 45$ years for all other diagnoses | Patient activity 2014-2018 | Face-to-face<br>Telehealth | Surgical specialists<br>Non-surgical specialists<br>Allied health providers<br>e.g. psychologist | Simple analgesics<br>Anti-inflammatory<br>Chondroitin/<br>Glucosamine<br>Topical products<br>Opioids<br>Neuromodulators | Lumbar plain radiograph<br>Lumbar CT<br>Lumbar MRI<br>Lumbar injection<br>Knee plain radiograph<br>Knee CT<br>Knee MRI<br>Knee ultrasound<br>Knee injection<br>Shoulder plain radiograph<br>Shoulder ultrasound<br>Shoulder MRI<br>Shoulder injection<br>Shoulder hydrodilatation<br>Cervical plain radiograph<br>Cervical CT<br>Cervical MRI<br>Cervical injection |

Table 2: Included SNOMED terms

| Low back diagnoses                         | Knee diagnoses                                  | Shoulder diagnoses                                                    | Neck diagnoses                               |
|--------------------------------------------|-------------------------------------------------|-----------------------------------------------------------------------|----------------------------------------------|
| Arthritis of spine                         | Acute meniscal tear, medial                     | Acromioclavicular joint structure                                     | Cervical arthritis                           |
| Arthropathy of spinal facet joint          | Anterior knee pain                              | Adhesive capsulitis of shoulder                                       | Cervical arthrodesis                         |
| Back problem                               | Arthritis of knee                               | Arthritis of acromioclavicular joint                                  | Cervical disc disorder                       |
| Backache                                   | Arthrodesis of knee                             | Arthrodesis of shoulder                                               | Cervical kyphosis                            |
| Bone structure of coccyx                   | Arthroscopic lateral patellar release           | Arthrography of shoulder                                              | Cervical laminectomy                         |
| Bone structure of L5                       | Arthroscopic meniscectomy                       | Arthroscopic acromioplasty                                            | Cervical myelopathy                          |
| Bone structure of sacrum                   | Arthroscopic procedure                          | Arthroscopic shoulder decompression                                   | Cervical nerve root compression              |
| Chondrectomy of spine                      | Arthroscopy of knee                             | Arthroscopy of shoulder                                               | Cervical radiculitis                         |
| Chronic back pain                          | Arthroscopy of knee with lateral meniscectomy   | Bursitis of shoulder                                                  | Cervical radiculopathy                       |
| Chronic lower back pain                    | Arthroscopy of knee with medial meniscectomy    | Calcific tendinitis                                                   | Cervical rib                                 |
| Compression fracture                       | Arthrotomy of knee                              | Calcific tendinitis of shoulder                                       | Cervical spinal fusion by anterior technique |
| Compression fracture of vertebral column   | Aspiration of knee joint                        | Capsulitis                                                            | Cervical spine degeneration                  |
| Compression of lumbar nerve root           | Both knees                                      | Contusion of shoulder region                                          | Cervical spine structure                     |
| Correction of scoliosis                    | Bursitis of knee                                | Detachment of the glenoid labrum and/or capsule of the shoulder joint | Cervicogenic headache                        |
| Crush fracture of lumbar vertebra          | Calcium pyrophosphate deposition disease        | Entire tendon of supraspinatus muscle                                 | Cervico-occipital neuralgia                  |
| CT of lumbar region                        | Chondrocalcinosis                               | Full thickness rotator cuff tear                                      | Chronic neck pain                            |
| CT of lumbar spine                         | Chondromalacia of patella                       | Impingement syndrome of shoulder region                               | CT of cervical spine                         |
| CT of spine                                | Complete tear, knee, medial collateral ligament | Inflammation of rotator cuff tendon                                   | CT of neck                                   |
| Curvature of spine                         | Contusion of knee                               | Injury of glenoid labrum of shoulder joint                            | Degeneration of cervical intervertebral disc |
| Decompression laminectomy                  | Derangement of knee                             | Injury of shoulder region                                             | Diffuse cervicobrachial syndrome             |
| Decompression of lumbar spine              | Disorder of patellofemoral joint                | MRI of shoulder                                                       | Excision of cervical intervertebral disc     |
| Degeneration of intervertebral disc        | Finding of tear meniscus                        | Osteoarthritis of acromioclavicular joint                             | Injury of cervical spine                     |
| Degeneration of lumbar intervertebral disc | Fracture of tibial plateau                      | Osteoarthritis of shoulder                                            | Kyphoscoliosis deformity of spine            |
| Diagnostic radiography of coccyx           | Haemarthrosis of knee                           | Painful arc syndrome                                                  | Kyphosis deformity of spine                  |
| Discitis                                   | Inflammation of bursa of patella                | Radiography of shoulder                                               | Magnetic resonance imaging of neck           |
| Discogenic pain                            |                                                 |                                                                       | MRI of cervical spine                        |

|    |                                 |                                      |                                      |                                    |
|----|---------------------------------|--------------------------------------|--------------------------------------|------------------------------------|
| 1  | Disorder of joint of spine      | Injury of anterior cruciate ligament | Repair of musculotendinous cuff of   | Muscle spasm of cervical muscle of |
| 2  | Disorder of vertebra            | Injury of knee                       | shoulder                             | neck                               |
| 3  | Exploration of spine            | Knee joint - varus deformity         | Repair of shoulder                   | Neck injury                        |
| 4  | Facet joint pain                | Knee joint effusion                  | Rotator cuff impingement syndrome    | Neck pain                          |
| 5  | Fracture of body of vertebra    | Knee joint valgus deformity          | Rotator cuff syndrome                | Neck sprain                        |
| 6  | Fracture of lumbar spine        | Knee locking                         | Rupture of tendon of biceps          | Neck structure                     |
| 7  | Fracture of sacrum              | Knee pain                            | Rupture of tendon of biceps, long    | Pain in cervical spine             |
| 8  | Fracture of vertebral column    | Knee region structure                | head                                 | Prolapsed cervical intervertebral  |
| 9  | Injury of back                  | Knee stiff                           | Shoulder pain                        | disc                               |
| 10 | Injury of coccyx                | Loose body in knee                   | Shoulder reconstruction              | Radiography of cervical spine      |
| 11 | Intervertebral disc prolapse    | MRI of knee                          | Shoulder region structure            | Spinal stenosis in cervical region |
| 12 | L4/5 disc                       | Osteoarthritis of knee               | Shoulder strain                      | Stiff neck                         |
| 13 | L5/S1 disc                      | Osteotomy of proximal tibia          | Shoulder tendinitis                  | Strain of neck muscle              |
| 14 | Laminectomy                     | Osteotomy of tibia                   | Sprain of acromioclavicular ligament | Strain of tendon of neck           |
| 15 | Lordosis deformity of spine     | Patellar instability                 | Sprain of shoulder                   | Torticollis                        |
| 16 | Low back pain                   | Patellar maltracking                 | Structure of left shoulder region    | Whiplash injury to neck            |
| 17 | Low back strain                 | Patellar tendonitis                  | Structure of right shoulder region   |                                    |
| 18 | Lower back injury               | Patellectomy                         | Structure of rotator cuff including  |                                    |
| 19 | Lower back structure            | Patellofemoral osteoarthritis        | muscles and tendons                  |                                    |
| 20 | Lumbar                          | Patellofemoral stress syndrome       | Subacromial bursitis                 |                                    |
| 21 | Lumbar discectomy               | Prepatellar bursitis                 | Subdeltoid bursitis                  |                                    |
| 22 | Lumbar laminectomy              | Problem knee                         | Subluxation of acromioclavicular     |                                    |
| 23 | Lumbar microdiscectomy          | Radiologic examination of knee       | joint                                |                                    |
| 24 | Lumbar radiculopathy            | Repair of anterior cruciate ligament | Subscapularis tendinitis             |                                    |
| 25 | Lumbar region back structure    | of knee joint                        | Supraspinatus tear                   |                                    |
| 26 | Lumbar spinal fusion            | Repair of knee collateral ligaments  | Supraspinatus tendinitis             |                                    |
| 27 | Lumbar sprain                   | Repair of knee cruciate ligaments    | Total shoulder replacement           |                                    |
| 28 | Lumbosacral spine               | Repair of meniscus                   | US shoulder region                   |                                    |
| 29 | Lumbosacral spondylosis         | Repair of patellar tendon            |                                      |                                    |
| 30 | Lumbosacral spondylosis without | Replacement of total knee joint      |                                      |                                    |
| 31 | myelopathy                      | Rupture of anterior cruciate         |                                      |                                    |
| 32 |                                 |                                      |                                      |                                    |
| 33 |                                 |                                      |                                      |                                    |
| 34 |                                 |                                      |                                      |                                    |
| 35 |                                 |                                      |                                      |                                    |
| 36 |                                 |                                      |                                      |                                    |
| 37 |                                 |                                      |                                      |                                    |
| 38 |                                 |                                      |                                      |                                    |
| 39 |                                 |                                      |                                      |                                    |
| 40 |                                 |                                      |                                      |                                    |
| 41 |                                 |                                      |                                      |                                    |
| 42 |                                 |                                      |                                      |                                    |
| 43 |                                 |                                      |                                      |                                    |
| 44 |                                 |                                      |                                      |                                    |
| 45 |                                 |                                      |                                      |                                    |
| 46 |                                 |                                      |                                      |                                    |

1  
2  
3  
4  
5  
6  
7  
8  
9  
10  
11  
12  
13  
14  
15  
16  
17  
18  
19  
20  
21  
22  
23  
24  
25  
26  
27  
28  
29  
30  
31  
32  
33  
34  
35  
36  
37  
38  
39  
40  
41  
42  
43  
44  
45  
46

|                                         |                                               |  |  |
|-----------------------------------------|-----------------------------------------------|--|--|
| Lumbosacral strain                      | ligament                                      |  |  |
| Lumbosacral radiculopathy               | Rupture of cruciate ligaments                 |  |  |
| Magnetic resonance imaging of spine     | Rupture of medial collateral ligament of knee |  |  |
| Manipulation of spine                   | Rupture of posterior cruciate ligament        |  |  |
| MRI of lumbar spine                     | Sprain of knee                                |  |  |
| Nerve root compression syndrome         | Sprain of lateral collateral ligament of knee |  |  |
| Nerve root disorder                     | Sprain of medial collateral ligament of knee  |  |  |
| Operative procedure on spinal structure | Stabilisation of patellofemoral joint         |  |  |
| Osteoarthritis of lumbar spine          | Strain of knee                                |  |  |
| Pain in lumbar spine                    | Strain of patellar tendon                     |  |  |
| Pain in the coccyx                      | Strain of tendon of medial thigh muscle       |  |  |
| Prolapsed lumbar intervertebral disc    | Structure of left knee                        |  |  |
| Radiography of spine                    | Structure of prepatellar bursa                |  |  |
| Sacral back pain                        | Structure of right knee                       |  |  |
| Sacroiliac arthrodesis                  | Subluxation of patellofemoral joint           |  |  |
| Sacroiliac joint inflamed               | Suprapatellar bursitis                        |  |  |
| Sacroiliac joint pain                   | Swollen knee                                  |  |  |
| Scoliosis deformity of spine            | Synovial cyst of knee                         |  |  |
| Scoliosis of lumbar spine               | Synovial cyst of popliteal space              |  |  |
| Spasm of back muscles                   | Tear of lateral meniscus of knee              |  |  |
| Spinal arthritis deformans              | Tear of medial meniscus of knee               |  |  |
| Spinal arthrodesis                      | Tear of meniscus of knee                      |  |  |
| Spinal claudication                     | Total knee replacement                        |  |  |
| Spinal injury                           | Total replacement of left knee joint          |  |  |
| Spinal stenosis                         | Total replacement of right knee joint         |  |  |
| Spinal stenosis of lumbar region        | Traumatic rupture of patellar                 |  |  |
| Spondylitis                             |                                               |  |  |
| Spondylolisthesis                       |                                               |  |  |

1  
2  
3  
4  
5  
6  
7  
8  
9  
10  
11  
12  
13  
14  
15  
16  
17  
18  
19  
20  
21  
22  
23  
24  
25  
26  
27  
28  
29  
30  
31  
32  
33  
34  
35  
36  
37  
38  
39  
40  
41  
42  
43  
44  
45  
46

|                                     |               |  |  |
|-------------------------------------|---------------|--|--|
| Spondylolisthesis L5/S1 level       | tendon        |  |  |
| Spondylolysis                       | Unstable knee |  |  |
| Spondylosis                         |               |  |  |
| Spondylosis without myelopathy      |               |  |  |
| Sprain of spinal ligament           |               |  |  |
| Sprain, lumbosacral ligament        |               |  |  |
| Stenosis of intervertebral foramina |               |  |  |
| Stiff back                          |               |  |  |
| Vertebral osteoporosis              |               |  |  |
| Vertebroplasty                      |               |  |  |
| Wedge fracture of vertebra          |               |  |  |
| X-ray of lumbosacral spine          |               |  |  |

For peer review only

Table 3: Included medication names

| Simple analgesics (N02BE*)                                                                                  | Non-steroidal anti-inflammatories (M01A*)                                                                                                                                                                                                                                                                                                                                        | Chondroitin and/or glucosamine (M01AX*)                                                                                                                                                                                                                                                                                                                                                                                                                                                                                                                                         | Topical products for joint and muscular pain (M02A*)                                                                                                                                                                                                                                                                                                                                                                                                                                                                                                                                                                                                                                                                                                                            | Opioids (N02A*)                                                                                                                                                                                                                                                                                                                                                                                                                                                              | Other epileptics (N03AX*) |
|-------------------------------------------------------------------------------------------------------------|----------------------------------------------------------------------------------------------------------------------------------------------------------------------------------------------------------------------------------------------------------------------------------------------------------------------------------------------------------------------------------|---------------------------------------------------------------------------------------------------------------------------------------------------------------------------------------------------------------------------------------------------------------------------------------------------------------------------------------------------------------------------------------------------------------------------------------------------------------------------------------------------------------------------------------------------------------------------------|---------------------------------------------------------------------------------------------------------------------------------------------------------------------------------------------------------------------------------------------------------------------------------------------------------------------------------------------------------------------------------------------------------------------------------------------------------------------------------------------------------------------------------------------------------------------------------------------------------------------------------------------------------------------------------------------------------------------------------------------------------------------------------|------------------------------------------------------------------------------------------------------------------------------------------------------------------------------------------------------------------------------------------------------------------------------------------------------------------------------------------------------------------------------------------------------------------------------------------------------------------------------|---------------------------|
| Caffeine,<br>Paracetamol<br>Paracetamol<br><br><b>Paracetamol combinations</b><br>Ibuprofen,<br>Paracetamol | Celecoxib<br>Diclofenac<br>Diclofenac potassium<br>Diclofenac sodium<br>Diclofenac sodium,<br>Misoprostol<br>Diclofenac, Misoprostol<br>Etoricoxib<br>Flurbiprofen<br>Ibuprofen<br>Ibuprofen lysine<br>Indomethacin<br>Ketoprofen<br>Ketorolac<br>Ketorolac trometamol<br>Lumiracoxib<br>Mefenamic acid<br>Meloxicam<br>Naproxen<br>Naproxen sodium<br>Naproxen,<br>Esomeprazole | Borate, Chondroitin,<br>Glucosamine, Manganese<br>Borate, Chondroitin,<br>Glucosamine, Manganese<br>Chondroitin, Copper,<br>Glucosamine, Manganese,<br>Zinc Sulfate<br>Chondroitin, Dimethyl Sulfone,<br>Glucosamine<br>Glucosamine<br>Glucosamine, Calcium,<br>Vitamin D, Minerals<br>Glucosamine, Chondroitin<br>Glucosamine hydrochloride<br>Glucosamine hydrochloride,<br>Chondroitin sulphate<br>Glucosamine hydrochloride,<br>Chondroitin sulfate, Dimethyl<br>sulfone<br>Glucosamine hydrochloride;<br>Chondroitin sulfate,<br>Manganese gluconate,<br>Calcium ascorbate | Benzydamine<br>Benzydamine hydrochloride<br>Cajuput oil, Camphor, Capsicum,<br>Eucalyptus oil, Hydroxybenzoate,<br>Mentha X Piperita, Menthol, Methyl<br>salicylate, Pinus, Turpentine oil<br>Cajuput oil, Camphor, Clove,<br>Menthol (TIGER BALM)<br>Camphor, Menthol, Eucalyptus oil,<br>Methyl salicylate<br>Camphor, Eucalyptus oil, Mentha X<br>Piperita, Menthol, Methyl salicylate,<br>Pinus, Turpentine oil<br>Camphor, Menthol, Methyl salicylate<br>Camphor, Eucalyptus oil, Menthol,<br>Methyl salicylate<br>Camphor, Eucalyptus oil, Methyl<br>salicylate, Menthol, Alisma plantago<br>aquatica Root oil extract, Bambusa<br>root<br>Capsaicin<br>Capsicum oleoresin, Arnica montana,<br>Arctium lappa root dry, Aloe<br>barbadensis inner leaf juice<br>Diclofenac | <b>Weak single opioids</b><br>Codeine<br>Codeine phosphate<br>Codeine phosphate<br>hemihydrate<br>Dextropropoxyphene<br>Dextropropoxyphene<br>napsylate<br>Tramadol<br>Tramadol hydrochloride<br><br><b>Combination weak opioid</b><br>Aspirin, Codeine phosphate<br>Codeine, Ibuprofen<br>Codeine phosphate,<br>Ibuprofen<br>Codeine, Paracetamol<br>Codeine Phosphate,<br>Paracetamol<br>Codeine phosphate<br>hemihydrate, Ibuprofen<br>Dextropropoxyphene,<br>Paracetamol | Gabapentin<br>Pregabalin  |

|    |                  |                                  |                                         |                              |
|----|------------------|----------------------------------|-----------------------------------------|------------------------------|
| 1  |                  |                                  |                                         |                              |
| 2  |                  |                                  |                                         |                              |
| 3  | Parecoxib        | Glucosamine hydrochloride,       | Diclofenac diethylamine                 | Dextropropoxyphene           |
| 4  | Parecoxib sodium | Calcium, Vitamin D, Vitamin K,   | Diclofenac diethylammonium              | napsylate, Paracetamol       |
| 5  | Piroxicam        | Boron                            | Diclofenac Sodium                       | Tramadol, Paracetamol        |
| 6  | Rofecoxib        | Glucosamine hydrochloride;       | Ethyl salicylate, Hydroxyethyl          | Tramadol hydrochloride,      |
| 7  | Sulindac         | Glucosamine sulfate, Glycine,    | salicylate, Methyl salicylate,          | Paracetamol                  |
| 8  | Tiaprofenic acid | fructose, Bioflavonoids,         | Nicotinic acid                          |                              |
| 9  |                  | Ascorbic acid, Histidine, Lysine | Eucalyptus oil                          | <b>Strong single opioids</b> |
| 10 |                  | hydrochloride, Leucine, Valine,  | Eucalyptus oil, Pine oil Pumilio,       | Fentanyl                     |
| 11 |                  | Perna caniculata powder,         | Peppermint oil, Camphor, Methyl         | Fentanyl citrate             |
| 12 |                  | Calcium pantothenate, Zinc       | salicylate, Menthol, Turpentine oil     | Hydromorphone                |
| 13 |                  | amino acid chelate,              | Eucalyptus oil, Menthol, Methyl         | Hydromorphone                |
| 14 |                  | Manganese amino acid             | salicylate                              | hydrochloride                |
| 15 |                  | chelate, Copper gluconate,       | Flurbiprofen sodium                     | Morphine                     |
| 16 |                  | Selenomethionine                 | Ibuprofen                               | Morphine hydrochloride       |
| 17 |                  | Glucosamine, Omega-3             | Ketoprofen                              | Morphine hydrochloride       |
| 18 |                  | triglycerides                    | Menthol                                 | trihydrate                   |
| 19 |                  | Glucosamine sulfate              | Menthol, Camphor, Cajuput oil,          | Morphine sulfate             |
| 20 |                  | Glucosamine sulfate,             | Clove oil, Dementholised mint oil       | Morphine sulfate Bp          |
| 21 |                  | Chondroitin sulfate (Shark)      | Menthol, Camphor, Cajuput oil,          | Morphine sulfate             |
| 22 |                  | Glucosamine sulfate, Shark       | Dementholised mint oil, Clove bud       | pentahydrate                 |
| 23 |                  | cartilage                        | oil                                     | Morphine tartrate            |
| 24 |                  | Glucosamine sulfate,             | Menthol, Glycol salicylate              | Oxycodone                    |
| 25 |                  | Potassium chloride               | Menthol, Eucalyptus oil, Methyl         | Oxycodone, Naloxone          |
| 26 |                  | Glucosamine sulfate sodium       | salicylate                              | Oxycodone hydrochloride      |
| 27 |                  | chloride, Eicosapentaenoic       | Methyl salicylate                       | Oxycodone pectinate          |
| 28 |                  | acid, Docosahexaenoic acid       | Methyl salicylate, Ethyl salicylate, 2- | Oxycodone hydrochloride,     |
| 29 |                  | Ascorbate, Glucosamine,          | Hydroxyethyl salicylate, Methyl         | Naloxone hydrochloride       |
| 30 |                  | Manganese, Turmeric              | nicotinate                              |                              |
| 31 |                  | Borate, Glucosamine,             |                                         |                              |
| 32 |                  | Manganese, Selenium              |                                         |                              |
| 33 |                  |                                  |                                         |                              |
| 34 |                  |                                  |                                         |                              |
| 35 |                  |                                  |                                         |                              |
| 36 |                  |                                  |                                         |                              |
| 37 |                  |                                  |                                         |                              |
| 38 |                  |                                  |                                         |                              |
| 39 |                  |                                  |                                         |                              |
| 40 |                  |                                  |                                         |                              |
| 41 |                  |                                  |                                         |                              |
| 42 |                  |                                  |                                         |                              |
| 43 |                  |                                  |                                         |                              |
| 44 |                  |                                  |                                         |                              |
| 45 |                  |                                  |                                         |                              |
| 46 |                  |                                  |                                         |                              |



1  
2  
3  
4  
5  
6  
7  
8  
9  
10  
11  
12  
13  
14  
15  
16  
17  
18  
19  
20  
21  
22  
23  
24  
25  
26  
27  
28  
29  
30  
31  
32  
33  
34  
35  
36  
37  
38  
39  
40  
41  
42  
43  
44  
45  
46

|  |  |                                                                                                                                                                    |                                                                                                                                                                                                                     |                                        |  |
|--|--|--------------------------------------------------------------------------------------------------------------------------------------------------------------------|---------------------------------------------------------------------------------------------------------------------------------------------------------------------------------------------------------------------|----------------------------------------|--|
|  |  | Ascorbate, Cod-liver oil,<br>Colecalciferol, Copper,<br>Cyanocobalamin, Folate,<br>Glucosamine, Manganese,<br>Omega-3 triglycerides,<br>Selenium, Tocopherol, Zinc | Methyl salicylate, Eucalyptus oil,<br>Menthol liquid<br>Methyl salicylate, Menthol<br>Nicoboxil/Nonivamide<br>Nonivamide, Butoxyethyl nicotinate<br>Piroxicam<br>Triethanolamine salicylate<br>Trolamine salicylate | Tapentadol<br>Tapentadol hydrochloride |  |
|--|--|--------------------------------------------------------------------------------------------------------------------------------------------------------------------|---------------------------------------------------------------------------------------------------------------------------------------------------------------------------------------------------------------------|----------------------------------------|--|

\* Anatomic and Therapeutic Classifications (ATC) category

For peer review only

**Table 4: Test name subgroups for low back, knee, shoulder, and neck imaging tests and procedures**

| Low back imaging subgroups    | Knee imaging subgroups | Shoulder imaging subgroups | Neck imaging subgroups |
|-------------------------------|------------------------|----------------------------|------------------------|
| Lumbosacral plain radiograph* | Knee plain radiograph* | Shoulder plain radiograph* | Neck plain radiograph* |
| Lumbosacral CT*               | Knee CT*               | Shoulder ultrasound*       | Neck CT*               |
| Lumbosacral MRI*              | Knee MRI*              | Shoulder MRI*              | Neck MRI*              |
| Lumbosacral injection*        | Knee injection*        | Shoulder injection*        | Neck injection*        |
| Lumbosacral unspecified*#     | Knee unspecified*#     | Shoulder unspecified*#     | Neck unspecified*#     |
| Lumbosacral ultrasound^       | Knee ultrasound*       | Shoulder hydrodilataion*   | Neck ultrasound^       |
| Lumbosacral other^            | Knee other^            | Shoulder other^            | Neck other^            |
|                               | Knee aspiration^       | Shoulder aspiration^       | Neck aspiration^       |
|                               | Knee arthrogram^       | Shoulder arthrogram^       |                        |
|                               |                        | Shoulder CT^               |                        |
|                               |                        | Shoulder fluoroscopy^      |                        |

\* Eligible

^ Ineligible

# Analyse as plain radiograph

## AUTHOR CONTRIBUTIONS

RH, DOC and RB conceived the study. LB and AG were responsible for data coding and the statistical analysis plan. CP provided expertise in the use of the POLAR database. DM provided clinical context in managing musculoskeletal conditions in the general practice setting. All authors contributed to refining the protocol and approved the submitted protocol.

## FUNDING STATEMENT

This work was supported by an Arthritis Queensland, Arthritis South Australia and the Allan and Beryl Stephens Grant from Arthritis Australia (ID N/A). Arthritis Australia did not contribute to the conduct of this study. It is also supported by an Australian National Health and Medical Research Council (NHMRC) Program Grant (APP1113532). DOC is supported by a TRIP Fellowship and RB is supported by an NHMRC Investigator Fellowship.

## COMPETING INTERESTS STATEMENT

RH, DOC, RB and DM report grants from Arthritis Australia (not-for-profit organisation), during the conduct of the study. CP is an employee of Outcome Health, the not-for-profit organisation that developed the POLAR database and chairs the Product improvement group of the Australian Digital Health Agency. It has no relationship with the research but has provided grant funding to Outcome Health. LB reports consultancy fees paid to Monash University from Charite Medical University Berlin, Jesuit Social Services Victoria, and Swinburne University of Technology, outside the submitted work.

## REFERENCES

1. Royal Australian College of General Practitioners. General Practice: Health of the Nation. East Melbourne, Vic: RACGP, 2019.
2. Britt H MG, Henderson J, Bayram C, Harrison C, Valenti L, Pan Y, Charles J, Pollack AJ, Wong C, Gordon J. General practice activity in Australia 2015–16. General practice series no. 40. Sydney: Sydney University Press, 2016.
3. Rahman N, Gruber D. The burden of musculoskeletal conditions in Australia: a detailed analysis of the Australian Burden of Disease Study 2011: Australian Institute of Health and Welfare 2017.
4. Vos T, Lim SS, Abbafati C, et al. Global burden of 369 diseases and injuries in 204 countries and territories, 1990–2019: a systematic analysis for the Global Burden of Disease Study 2019. *The Lancet* 2020;396(10258):1204-22.
5. Britt H MG, Bayram C, Henderson J, Valenti L, Harrison C, Pan Y, Charles J,, Pollack AJ CT, Gordon J, Wong C. A decade of Australian general practice activity 2006–07 to 2015–16. General practice series no. 41. Sydney: Sydney University Press, 2016.
6. Bennell KL BC, Harrison C, Brand C, Buchbinder R, Haas R, and Hinman RS. Trends in management of hip and knee osteoarthritis in general practice in Australia over an 11-year window: a nationwide cross-sectional survey. *The Lancet Regional Health – Western Pacific* 2021;12 doi: <https://authors.elsevier.com/sd/article/S2666606521000961>
7. Naunton J, Harrison C, Britt H, et al. General practice management of rotator cuff related shoulder pain: A reliance on ultrasound and injection guided care. *Plos one* 2020;15(1):e0227688.
8. Busingye D, Gianacas C, Pollack A, et al. Data Resource Profile: MedicineInsight, an Australian national primary health care database. *International Journal of Epidemiology* 2019;48(6):1741-41h.
9. Pearce C, McLeod A, Rinehart N, et al. What a Comprehensive, Integrated Data Strategy Looks Like: The Population Level Analysis and Reporting (POLAR) Program. *Stud Health Technol Inform* 2019;264:303-07.
10. de Lusignan S, Sun B, Pearce C, et al. Coding errors in an analysis of the impact of pay-for-performance on the care for long-term cardiovascular disease: a case study. *Journal of Innovation in Health Informatics* 2014;21(2):92-101.
11. Hemkens LG, Benchimol EI, Langan SM, et al. The reporting of studies using routinely collected health data was often insufficient. *Journal of clinical epidemiology* 2016;79:104-11.
12. Benchimol EI, Smeeth L, Guttman A, et al. The REporting of studies Conducted using Observational Routinely-collected health Data (RECORD) statement. *PLoS Med* 2015;12(10):e1001885.
13. Healthmap: Healthdirect Australia; [Available from: <https://studio.healthmap.com.au/#/h4f> accessed 27th September 2020.
14. The State of Victoria Department of Premier and Cabinet. Population Diversity in Victoria: 2016 Census Local Government Areas, 2018.
15. Yan J, Hawes L, Turner L, et al. Antimicrobial prescribing for children in primary care. *Journal of paediatrics and child health* 2019;55(1):54-58.
16. Turner LR, Pearce C, Borg M, et al. Characteristics of patients presenting to an after-hours clinic: results of a MAGNET analysis. *Australian journal of primary health* 2017;23(3):294-99.
17. Turner LR, Cicuttini F, Pearce C, et al. Cardiovascular disease screening in general practice: General practitioner recording of common risk factors. *Preventive medicine* 2017;99:282-85.
18. Sezgin G, Georgiou A, Hardie R-A, et al. Compliance with pathology testing guidelines in Australian general practice: protocol for a secondary analysis of electronic health record data. *BMJ open* 2018;8(11)
19. Australian Institute of Health and Welfare. Musculoskeletal conditions and comorbidity in Australia. Canberra: AIHW, 2019.

- 1
- 2
- 3
- 4 20. Pearce C, McLeod A, Patrick J, et al. Coding and classifying GP data: the POLAR project. *BMJ health & care informatics* 2019;26(1)
- 5
- 6 21. Cotd R, Rothwell D, Palotay J, et al. The Systematized Nomenclature of Human and Veterinary
- 7 Medicine-SNOMED International. *Northfield, IL: College of American Pathologists* 1993
- 8 22. World Health Organization. WHO collaborating Centre for Drug Statistics Methodology: ATC
- 9 classification index with DDDs and guidelines for ATC classification and DDD assignment
- 10 2020. *Oslo, Norway: Norwegian Institute of Public Health* 2019
- 11 23. Hovis KK, Alizai H, Tham S-C, et al. Non-traumatic anterior cruciate ligament abnormalities and
- 12 their relationship to osteoarthritis using morphological grading and cartilage T2 relaxation
- 13 times: data from the Osteoarthritis Initiative (OAI). *Skeletal radiology* 2012;41(11):1435-43.
- 14 24. Buchbinder R, Underwood M, Hartvigsen J, et al. The Lancet Series call to action to reduce low
- 15 value care for low back pain: an update. *Pain* 2020;161(1):S57.
- 16 25. Mathieson S, Wertheimer G, Maher C, et al. What proportion of patients with chronic noncancer
- 17 pain are prescribed an opioid medicine? Systematic review and meta-regression of
- 18 observational studies. *Journal of Internal Medicine* 2020;287(5):458-74.
- 19 26. Ittaman SV, VanWormer JJ, Rezkalla SH. The role of aspirin in the prevention of cardiovascular
- 20 disease. *Clinical medicine & research* 2014;12(3-4):147-54.
- 21 27. Herrett E, Gallagher AM, Bhaskaran K, et al. Data resource profile: clinical practice research
- 22 datalink (CPRD). *International journal of epidemiology* 2015;44(3):827-36.
- 23 28. Springate DA, Kontopantelis E, Ashcroft DM, et al. ClinicalCodes: an online clinical codes
- 24 repository to improve the validity and reproducibility of research using electronic medical
- 25 records. *PloS one* 2014;9(6):e99825.
- 26 29. Australian Bureau of Statistics. Socio-economic indexes for areas (SEIFA) - technical paper 2016.
- 27 *cat no 20330 55001* 2018
- 28 30. Halpin B. SADI: Sequence analysis tools for Stata. *The Stata Journal* 2017;17(3):546-72.
- 29 31. Dalmaijer ES, Nord CL, Astle DE. Statistical power for cluster analysis. *arXiv preprint*
- 30 *arXiv:200300381* 2020
- 31 32. Imai C, Hardie R-A, Franco GS, et al. Harnessing the potential of electronic general practice
- 32 pathology data in Australia: An examination of the quality use of pathology for type 2
- 33 diabetes patients. *International Journal of Medical Informatics* 2020;141:104189.
- 34 33. Harrison C, Britt H, Miller G, et al. Prevalence of chronic conditions in Australia. *PloS one*
- 35 2013;8(7):e67494.
- 36
- 37
- 38
- 39
- 40
- 41
- 42
- 43
- 44
- 45
- 46
- 47
- 48
- 49
- 50
- 51
- 52
- 53
- 54
- 55
- 56
- 57
- 58
- 59
- 60

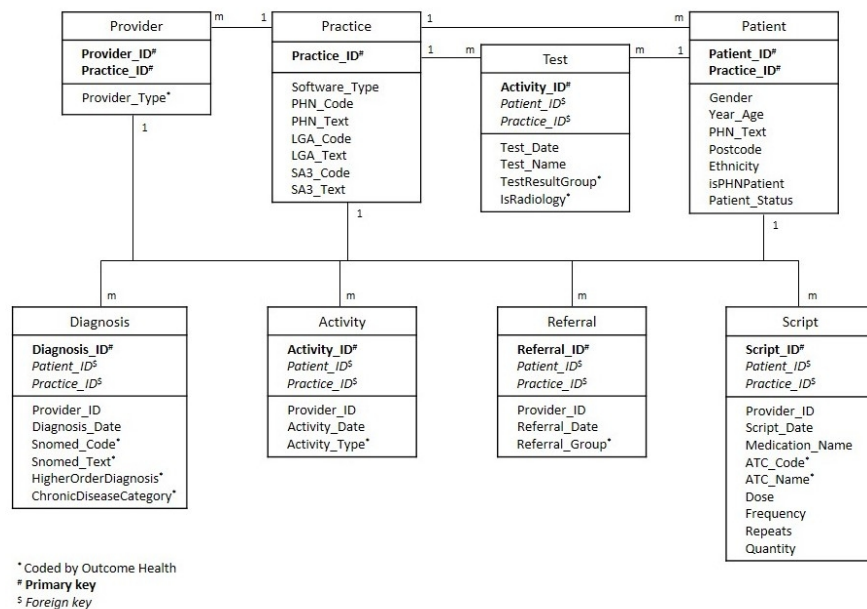

Figure 1

271x186mm (96 x 96 DPI)

1  
2  
3  
4  
5  
6  
7  
8  
9  
10  
11  
12  
13  
14  
15  
16  
17  
18  
19  
20  
21  
22  
23  
24  
25  
26  
27  
28  
29  
30  
31  
32  
33  
34  
35  
36  
37  
38  
39  
40  
41  
42  
43  
44  
45  
46  
47  
48  
49  
50  
51  
52  
53  
54  
55  
56  
57  
58  
59  
60

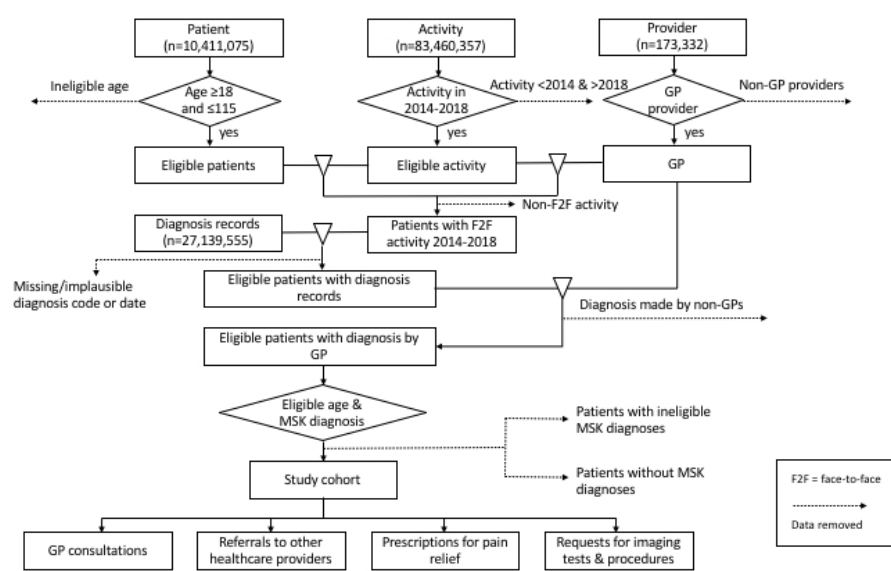

Figure 2

60x34mm (300 x 300 DPI)



## Appendix 1. Initial string match terms used to code imaging records

| Imaging region strings                                                                    | X-ray strings                                                                                                                                                                                                                                                                                          | MRI strings                                                                                                                                                                                   | CT strings                                        | Ultrasound strings                                                                                                              |
|-------------------------------------------------------------------------------------------|--------------------------------------------------------------------------------------------------------------------------------------------------------------------------------------------------------------------------------------------------------------------------------------------------------|-----------------------------------------------------------------------------------------------------------------------------------------------------------------------------------------------|---------------------------------------------------|---------------------------------------------------------------------------------------------------------------------------------|
| <b>Knee</b>                                                                               |                                                                                                                                                                                                                                                                                                        |                                                                                                                                                                                               |                                                   |                                                                                                                                 |
| KNEE<br>KN<br>BOTH K*<br><br><b>Exclude:</b><br>KNOW<br>KNIGHT                            | X-RAY KN<br>X-RAY RIGHT KN<br>X-RAY LEFT KN<br>XRAY KN<br>XRAY RIGHT KN<br>XRAY LEFT KN<br>XR KN<br>XR RIGHT KN<br>XR LEFT KN<br>PLAIN FILM KN<br>PLAIN FILM RIGHT KN<br>PLAIN FILM LEFT KN<br>RADIOGRAPH KN<br>RADIOGRAPH RIGHT KN<br>RADIOGRAPH LEFT KN<br>KNEE X<br>KNEE RADIOGR<br>KNEE PLAIN FILM | MRI KN<br>MRI RIGHT KN<br>MRI LEFT KN<br>MR KN<br>MR RIGHT KN<br>MR LEFT KN<br>MAGNETIC RESONANCE KN<br>MAGNETIC RESONANCE RIGHT KN<br>MAGNETIC RESONANCE LEFT KN<br>KNEE MR<br>KNEE MAGNETIC | CT KN<br>CT RIGHT KN<br>CT LEFT KN<br>KNEE CT     | US KN<br>US RIGHT KN<br>US LEFT KN<br>ULTRASOUND KN<br>ULTRASOUND RIGHT KN<br>ULTRASOUND LEFT KN<br>KNEE US<br>KNEE ULT         |
| <b>Shoulder</b>                                                                           |                                                                                                                                                                                                                                                                                                        |                                                                                                                                                                                               |                                                   |                                                                                                                                 |
| SHOULDER<br>SH<br>CLAVICLE*<br><br><b>Exclude:</b><br>SHBG<br>TSH<br>SHEET<br>FSH<br>GSHS | X-RAY SH<br>X-RAY RIGHT SH<br>X-RAY LEFT SH<br>XRAY SH<br>XRAY RIGHT SH<br>XRAY LEFT SH<br>XR SH<br>XR RIGHT SH<br>XR LEFT SH<br>PLAIN FILM SH                                                                                                                                                         | MRI SH<br>MRI RIGHT SH<br>MRI LEFT SH<br>MR SH<br>MR RIGHT SH<br>MR LEFT SH<br>MAGNETIC RESONANCE SH<br>MAGNETIC RESONANCE RIGHT SH<br>MAGNETIC RESONANCE LEFT SH<br>SHOULDER MR              | CT SH<br>CT RIGHT SH<br>CT LEFT SH<br>SHOULDER CT | US SH<br>US RIGHT SH<br>US LEFT SH<br>ULTRASOUND SH<br>ULTRASOUND RIGHT SH<br>ULTRASOUND LEFT SH<br>SHOULDER US<br>SHOULDER ULT |

|                                                                                         |                                                                                                                                                                                                                                                                                      |                                                                              |                                                  |                                                                                                                        |
|-----------------------------------------------------------------------------------------|--------------------------------------------------------------------------------------------------------------------------------------------------------------------------------------------------------------------------------------------------------------------------------------|------------------------------------------------------------------------------|--------------------------------------------------|------------------------------------------------------------------------------------------------------------------------|
| PSH<br>SH/                                                                              | PLAIN FILM RIGHT SH<br>PLAIN FILM LEFT SH<br>RADIOGRAPH SH<br>RADIOGRAPH RIGHT SH<br>RADIOGRAPH LEFT SH<br>SHOULDER X<br>SHOULDER RADIOGR<br>SHOULDER PLAIN FILM                                                                                                                     | SHOULDER MAGNETIC                                                            |                                                  |                                                                                                                        |
| <b>Neck</b>                                                                             |                                                                                                                                                                                                                                                                                      |                                                                              |                                                  |                                                                                                                        |
| NECK<br>NEC<br>CERVIC<br>C1<br>C2<br>C3<br>C4<br>C5<br>C6<br>C7<br>C SPINE<br>SPINE CX* | X-RAY NECK<br>XRAY NECK<br>XR NECK<br>X-RAY CERVICAL<br>XRAY CERVICAL<br>XR CERVICAL<br>PLAIN FILM NECK<br>PLAIN FILM CERVICAL<br>RADIOGRAPH NECK<br>RADIOGRAPH CERVICAL<br>NECK X<br>CERVICAL X<br>NECK PLAIN FILM<br>CERVICAL PLAIN FILM<br>NECK RADIOGRAPH<br>CERVICAL RADIOGRAPH | MRI NECK<br>MR NECK<br>MRI CERVICAL<br>MR CERVICAL<br>NECK MR<br>CERVICAL MR | CT NECK<br>CT CERVICAL<br>NECK CT<br>CERVICAL CT | US NECK<br>US CERVICAL<br>ULTRASOUND NECK<br>ULTRASOUND CERVICAL<br>NECK US<br>CERVICAL US<br>NECK ULT<br>CERVICAL ULT |
| <b>Exclude:</b><br>FEMORAL NECK<br>CERVICAL CYTOLOGY                                    |                                                                                                                                                                                                                                                                                      |                                                                              |                                                  |                                                                                                                        |
| <b>Low back</b>                                                                         |                                                                                                                                                                                                                                                                                      |                                                                              |                                                  |                                                                                                                        |
| LUMB<br>SACR<br>L1<br>L2<br>L3<br>L4<br>L5                                              | X-RAY LUMB<br>XRAY LUMB<br>XR LUMB<br>X-RAY SACR<br>XRAY SACR<br>XR SACR<br>PLAIN FILM LUMB                                                                                                                                                                                          | MRI LUMB<br>MR LUMB<br>MRI SACR<br>MR SACR<br>LUMBAR MR<br>SACRAL MR         | CT LUMB<br>CT SACR<br>LUMBAR CT<br>SACRAL CT     | US LUMB<br>ULTRASOUND LUMB<br>US SACR<br>ULTRASOUND SACR<br>LUMBAR US<br>LUMBAR ULT<br>SACRAL US                       |

|                                                      |                                                                                                                                                                                  |  |  |                   |
|------------------------------------------------------|----------------------------------------------------------------------------------------------------------------------------------------------------------------------------------|--|--|-------------------|
| <p>LOWER BACK</p> <p><b>Exclude:</b><br/>FUNGAL2</p> | <p>PLAIN FILM SACR<br/>RADIOGRAPH LUMB<br/>RADIOGRAPH SACR<br/>LUMBAR X<br/>LUMBAR RADIOGRAPH<br/>LUMBAR PLAIN FILM<br/>SACRAL X<br/>SACRAL RADIOGRAPH<br/>SACRAL PLAIN FILM</p> |  |  | <p>SACRAL ULT</p> |
|------------------------------------------------------|----------------------------------------------------------------------------------------------------------------------------------------------------------------------------------|--|--|-------------------|

\*String match term added after initial coding

1  
2  
3  
4  
5  
6  
7  
8  
9  
10  
11  
12  
13  
14  
15  
16  
17  
18  
19  
20  
21  
22  
23  
24  
25  
26  
27  
28  
29  
30  
31  
32  
33  
34  
35  
36  
37  
38  
39  
40  
41  
42  
43  
44  
45  
46

**Appendix 2**

**The RECORD statement – checklist of items, extended from the STROBE statement that should be reported in observational studies using routinely collected health data.**

|                           | Item No. | STROBE items                                                                                                                                                                               | Location in manuscript where items are reported                                                                                                                                                                | RECORD items                                                                                                                                                                                                                                                                                                                                                                                                                                | Location in manuscript where items are reported                                                                                                                              |
|---------------------------|----------|--------------------------------------------------------------------------------------------------------------------------------------------------------------------------------------------|----------------------------------------------------------------------------------------------------------------------------------------------------------------------------------------------------------------|---------------------------------------------------------------------------------------------------------------------------------------------------------------------------------------------------------------------------------------------------------------------------------------------------------------------------------------------------------------------------------------------------------------------------------------------|------------------------------------------------------------------------------------------------------------------------------------------------------------------------------|
| <b>Title and abstract</b> |          |                                                                                                                                                                                            |                                                                                                                                                                                                                |                                                                                                                                                                                                                                                                                                                                                                                                                                             |                                                                                                                                                                              |
|                           | 1        | (a) Indicate the study’s design with a commonly used term in the title or the abstract (b) Provide in the abstract an informative and balanced summary of what was done and what was found | a) Study design (observational cohort study) is included in the title<br><br>b) Abstract (methods and analysis) contains a summary of what was done. As this is a protocol, what was found is not applicable   | RECORD 1.1: The type of data used should be specified in the title or abstract. When possible, the name of the databases used should be included.<br><br>RECORD 1.2: If applicable, the geographic region and timeframe within which the study took place should be reported in the title or abstract.<br><br>RECORD 1.3: If linkage between databases was conducted for the study, this should be clearly stated in the title or abstract. | Title & abstract<br><br>Methods and analysis of Abstract refers to geographic region (South Eastern Victoria) and timeframe within the study (1/1/14 to 31/12/18)<br><br>N/A |
| <b>Introduction</b>       |          |                                                                                                                                                                                            |                                                                                                                                                                                                                |                                                                                                                                                                                                                                                                                                                                                                                                                                             |                                                                                                                                                                              |
| Background rationale      | 2        | Explain the scientific background and rationale for the investigation being reported                                                                                                       | Introduction contains rationale for protocol (explicit reporting of the systematic approach used to classify and select eligible records from the POLAR database will facilitate replication and transparency) |                                                                                                                                                                                                                                                                                                                                                                                                                                             |                                                                                                                                                                              |
| Objectives                | 3        | State specific objectives, including any prespecified hypotheses                                                                                                                           | Objectives<br>No prespecified hypotheses reported as this is a protocol                                                                                                                                        |                                                                                                                                                                                                                                                                                                                                                                                                                                             |                                                                                                                                                                              |
| <b>Methods</b>            |          |                                                                                                                                                                                            |                                                                                                                                                                                                                |                                                                                                                                                                                                                                                                                                                                                                                                                                             |                                                                                                                                                                              |
| Study Design              | 4        | Present key elements of study design early in the paper                                                                                                                                    | Study design section of Methods (retrospective cohort study)                                                                                                                                                   |                                                                                                                                                                                                                                                                                                                                                                                                                                             |                                                                                                                                                                              |
| Setting                   | 5        | Describe the setting, locations, and relevant dates, including periods of recruitment, exposure, follow-up, and data collection                                                            | Setting section of Methods includes locations of practices with POLAR database, dates of the study period (exposure and data collection) and follow-up                                                         |                                                                                                                                                                                                                                                                                                                                                                                                                                             |                                                                                                                                                                              |

|                              |    |                                                                                                                                                                                                                                                                                                                                                                                                                                                                                                                                                                                                                                                                                                                              |                                                                                                                                                                                                                                |                                                                                                                                                                                                                                                                                                                                                                                                                                                                                                                                                                                                                                                                                                      |                                                                                                                         |
|------------------------------|----|------------------------------------------------------------------------------------------------------------------------------------------------------------------------------------------------------------------------------------------------------------------------------------------------------------------------------------------------------------------------------------------------------------------------------------------------------------------------------------------------------------------------------------------------------------------------------------------------------------------------------------------------------------------------------------------------------------------------------|--------------------------------------------------------------------------------------------------------------------------------------------------------------------------------------------------------------------------------|------------------------------------------------------------------------------------------------------------------------------------------------------------------------------------------------------------------------------------------------------------------------------------------------------------------------------------------------------------------------------------------------------------------------------------------------------------------------------------------------------------------------------------------------------------------------------------------------------------------------------------------------------------------------------------------------------|-------------------------------------------------------------------------------------------------------------------------|
| Participants                 | 6  | <p>(a) <i>Cohort study</i> - Give the eligibility criteria, and the sources and methods of selection of participants. Describe methods of follow-up</p> <p><i>Case-control study</i> - Give the eligibility criteria, and the sources and methods of case ascertainment and control selection. Give the rationale for the choice of cases and controls</p> <p><i>Cross-sectional study</i> - Give the eligibility criteria, and the sources and methods of selection of participants</p> <p>(b) <i>Cohort study</i> - For matched studies, give matching criteria and number of exposed and unexposed</p> <p><i>Case-control study</i> - For matched studies, give matching criteria and the number of controls per case</p> | <p>Eligibility criteria are presented in Table 2. Sources and methods of selection are described in Variables section of Methods.</p> <p>Setting – patient-level follow-up data until 31/12/18 will be included</p> <p>N/A</p> | <p>RECORD 6.1: The methods of study population selection (such as codes or algorithms used to identify subjects) should be listed in detail. If this is not possible, an explanation should be provided.</p> <p>RECORD 6.2: Any validation studies of the codes or algorithms used to select the population should be referenced. If validation was conducted for this study and not published elsewhere, detailed methods and results should be provided.</p> <p>RECORD 6.3: If the study involved linkage of databases, consider use of a flow diagram or other graphical display to demonstrate the data linkage process, including the number of individuals with linked data at each stage.</p> | <p>Variables section of Methods</p> <p>Diagnoses and imaging records within Variables section of Methods</p> <p>N/A</p> |
| Variables                    | 7  | Clearly define all outcomes, exposures, predictors, potential confounders, and effect modifiers. Give diagnostic criteria, if applicable.                                                                                                                                                                                                                                                                                                                                                                                                                                                                                                                                                                                    | Variables section of Methods and Tables 3, 4 & 5                                                                                                                                                                               | RECORD 7.1: A complete list of codes and algorithms used to classify exposures, outcomes, confounders, and effect modifiers should be provided. If these cannot be reported, an explanation should be provided.                                                                                                                                                                                                                                                                                                                                                                                                                                                                                      | Variables section of Methods and Tables 3, 4 & 5                                                                        |
| Data sources/<br>measurement | 8  | For each variable of interest, give sources of data and details of methods of assessment (measurement). Describe comparability of assessment methods if there is more than one group                                                                                                                                                                                                                                                                                                                                                                                                                                                                                                                                         | Data source section of Methods                                                                                                                                                                                                 |                                                                                                                                                                                                                                                                                                                                                                                                                                                                                                                                                                                                                                                                                                      |                                                                                                                         |
| Bias                         | 9  | Describe any efforts to address potential sources of bias                                                                                                                                                                                                                                                                                                                                                                                                                                                                                                                                                                                                                                                                    | Variables and data cleaning sections of Methods                                                                                                                                                                                |                                                                                                                                                                                                                                                                                                                                                                                                                                                                                                                                                                                                                                                                                                      |                                                                                                                         |
| Study size                   | 10 | Explain how the study size was arrived at                                                                                                                                                                                                                                                                                                                                                                                                                                                                                                                                                                                                                                                                                    | Sample size consideration                                                                                                                                                                                                      |                                                                                                                                                                                                                                                                                                                                                                                                                                                                                                                                                                                                                                                                                                      |                                                                                                                         |
| Quantitative variables       | 11 | Explain how quantitative variables were handled in the analyses. If applicable, describe which groupings were chosen, and why                                                                                                                                                                                                                                                                                                                                                                                                                                                                                                                                                                                                | Analyses section of Methods                                                                                                                                                                                                    |                                                                                                                                                                                                                                                                                                                                                                                                                                                                                                                                                                                                                                                                                                      |                                                                                                                         |
| Statistical methods          | 12 | (a) Describe all statistical methods, including those used to control for confounding                                                                                                                                                                                                                                                                                                                                                                                                                                                                                                                                                                                                                                        | a) Analyses section of Methods<br>b) N/A                                                                                                                                                                                       |                                                                                                                                                                                                                                                                                                                                                                                                                                                                                                                                                                                                                                                                                                      |                                                                                                                         |

|                                  |    |                                                                                                                                                                                                                                                                                                                                                                                                                                                                             |                                                                                                                                                                                                                                                                                                                                                                                                                                                     |                                                                                                                                                                                                                                                                                                                    |                                                                          |
|----------------------------------|----|-----------------------------------------------------------------------------------------------------------------------------------------------------------------------------------------------------------------------------------------------------------------------------------------------------------------------------------------------------------------------------------------------------------------------------------------------------------------------------|-----------------------------------------------------------------------------------------------------------------------------------------------------------------------------------------------------------------------------------------------------------------------------------------------------------------------------------------------------------------------------------------------------------------------------------------------------|--------------------------------------------------------------------------------------------------------------------------------------------------------------------------------------------------------------------------------------------------------------------------------------------------------------------|--------------------------------------------------------------------------|
|                                  |    | (b) Describe any methods used to examine subgroups and interactions<br>(c) Explain how missing data were addressed<br>(d) <i>Cohort study</i> - If applicable, explain how loss to follow-up was addressed<br><i>Case-control study</i> - If applicable, explain how matching of cases and controls was addressed<br><i>Cross-sectional study</i> - If applicable, describe analytical methods taking account of sampling strategy<br>(e) Describe any sensitivity analyses | c) Approach to dataset creation<br>d) Data access and cleaning – only data after which there has been consistent reporting within a practice will be included<br>e) Analyses – sensitivity analysis to include entire follow-up period (instead of 1 year) for each participant and based on date of most recent diagnosis instead of index diagnosis for participants with multiple body regions affected by an eligible musculoskeletal diagnosis |                                                                                                                                                                                                                                                                                                                    |                                                                          |
| Data access and cleaning methods |    | ..                                                                                                                                                                                                                                                                                                                                                                                                                                                                          |                                                                                                                                                                                                                                                                                                                                                                                                                                                     | RECORD 12.1: Authors should describe the extent to which the investigators had access to the database population used to create the study population.<br><br>RECORD 12.2: Authors should provide information on the data cleaning methods used in the study.                                                       | Data access and cleaning methods<br><br>Data access and cleaning methods |
| Linkage                          |    | ..                                                                                                                                                                                                                                                                                                                                                                                                                                                                          |                                                                                                                                                                                                                                                                                                                                                                                                                                                     | RECORD 12.3: State whether the study included person-level, institutional-level, or other data linkage across two or more databases. The methods of linkage and methods of linkage quality evaluation should be provided.                                                                                          | N/A                                                                      |
| <b>Results</b>                   |    |                                                                                                                                                                                                                                                                                                                                                                                                                                                                             |                                                                                                                                                                                                                                                                                                                                                                                                                                                     |                                                                                                                                                                                                                                                                                                                    |                                                                          |
| Participants                     | 13 | (a) Report the numbers of individuals at each stage of the study ( <i>e.g.</i> , numbers potentially eligible, examined for eligibility, confirmed eligible, included in the study, completing follow-up, and analysed)<br>(b) Give reasons for non-participation at each stage.<br>(c) Consider use of a flow diagram                                                                                                                                                      | N/A                                                                                                                                                                                                                                                                                                                                                                                                                                                 | RECORD 13.1: Describe in detail the selection of the persons included in the study ( <i>i.e.</i> , study population selection) including filtering based on data quality, data availability and linkage. The selection of included persons can be described in the text and/or by means of the study flow diagram. | N/A                                                                      |
| Descriptive data                 | 14 | (a) Give characteristics of study participants ( <i>e.g.</i> , demographic, clinical, social) and information on                                                                                                                                                                                                                                                                                                                                                            | N/A                                                                                                                                                                                                                                                                                                                                                                                                                                                 |                                                                                                                                                                                                                                                                                                                    |                                                                          |

|                   |    |                                                                                                                                                                                                                                                                                                                                                                                                                                |            |                                                                                                                                                                                                                                                                                                          |            |
|-------------------|----|--------------------------------------------------------------------------------------------------------------------------------------------------------------------------------------------------------------------------------------------------------------------------------------------------------------------------------------------------------------------------------------------------------------------------------|------------|----------------------------------------------------------------------------------------------------------------------------------------------------------------------------------------------------------------------------------------------------------------------------------------------------------|------------|
|                   |    | <p>exposures and potential confounders</p> <p>(b) Indicate the number of participants with missing data for each variable of interest</p> <p>(c) <i>Cohort study</i> - summarise follow-up time (e.g., average and total amount)</p>                                                                                                                                                                                           |            |                                                                                                                                                                                                                                                                                                          |            |
| Outcome data      | 15 | <p><i>Cohort study</i> - Report numbers of outcome events or summary measures over time</p> <p><i>Case-control study</i> - Report numbers in each exposure category, or summary measures of exposure</p> <p><i>Cross-sectional study</i> - Report numbers of outcome events or summary measures</p>                                                                                                                            | N/A        |                                                                                                                                                                                                                                                                                                          |            |
| Main results      | 16 | <p>(a) Give unadjusted estimates and, if applicable, confounder-adjusted estimates and their precision (e.g., 95% confidence interval). Make clear which confounders were adjusted for and why they were included</p> <p>(b) Report category boundaries when continuous variables were categorized</p> <p>(c) If relevant, consider translating estimates of relative risk into absolute risk for a meaningful time period</p> | N/A        |                                                                                                                                                                                                                                                                                                          |            |
| Other analyses    | 17 | Report other analyses done—e.g., analyses of subgroups and interactions, and sensitivity analyses                                                                                                                                                                                                                                                                                                                              | N/A        |                                                                                                                                                                                                                                                                                                          |            |
| <b>Discussion</b> |    |                                                                                                                                                                                                                                                                                                                                                                                                                                |            |                                                                                                                                                                                                                                                                                                          |            |
| Key results       | 18 | Summarise key results with reference to study objectives                                                                                                                                                                                                                                                                                                                                                                       | N/A        |                                                                                                                                                                                                                                                                                                          |            |
| Limitations       | 19 | Discuss limitations of the study, taking into account sources of potential bias or imprecision. Discuss both direction and magnitude of any potential bias                                                                                                                                                                                                                                                                     | Discussion | RECORD 19.1: Discuss the implications of using data that were not created or collected to answer the specific research question(s). Include discussion of misclassification bias, unmeasured confounding, missing data, and changing eligibility over time, as they pertain to the study being reported. | Discussion |



|                            |                                                           |    |                                                                                                                                                                            |                                                                                                                           |                                                                                                                                                          |                                                                    |
|----------------------------|-----------------------------------------------------------|----|----------------------------------------------------------------------------------------------------------------------------------------------------------------------------|---------------------------------------------------------------------------------------------------------------------------|----------------------------------------------------------------------------------------------------------------------------------------------------------|--------------------------------------------------------------------|
| 1<br>2<br>3<br>4           | Interpretation                                            | 20 | Give a cautious overall interpretation of results considering objectives, limitations, multiplicity of analyses, results from similar studies, and other relevant evidence | N/A                                                                                                                       |                                                                                                                                                          |                                                                    |
| 5<br>6<br>7<br>8<br>9      | Generalisability                                          | 21 | Discuss the generalisability (external validity) of the study results                                                                                                      | Discussion – potential representativeness of the POLAR database and generalizability to the wider population is discussed |                                                                                                                                                          |                                                                    |
| 10                         | <b>Other Information</b>                                  |    |                                                                                                                                                                            |                                                                                                                           |                                                                                                                                                          |                                                                    |
| 11<br>12<br>13<br>14<br>15 | Funding                                                   | 22 | Give the source of funding and the role of the funders for the present study and, if applicable, for the original study on which the present article is based              | Funding statement                                                                                                         |                                                                                                                                                          |                                                                    |
| 16<br>17<br>18<br>19<br>20 | Accessibility of protocol, raw data, and programming code |    | ..                                                                                                                                                                         |                                                                                                                           | RECORD 22.1: Authors should provide information on how to access any supplemental information such as the study protocol, raw data, or programming code. | Appendix 1 – initial string match terms used to code imaging tests |

\*Reference: Benchimol EI, Smeeth L, Guttman A, Harron K, Moher D, Petersen I, Sørensen HT, von Elm E, Langan SM, the RECORD Working Committee. The REporting of studies Conducted using Observational Routinely-collected health Data (RECORD) Statement. *PLoS Medicine* 2015; in press.

\*Checklist is protected under Creative Commons Attribution ([CC BY](https://creativecommons.org/licenses/by/4.0/)) license.
