# Supplementary material for: Patterns of care for people presenting to Australian general practice with musculoskeletal complaints based on routinely collected data: protocol for an observational cohort study using the Population Level Analysis and Reporting (POLAR) database
Source: PubMed Central journal article supplement — BMJ Open. 2021 Sep 24;11(9):e055528. doi: 10.1136/bmjopen-2021-055528 (PMC8475141; doi:10.1136/bmjopen-2021-055528), 2021-09-24
Supplement: bmjopen-2021-055528supp001.pdf [file bmjopen-2021-055528supp001.pdf]

## Appendix 1. Initial string match terms used to code imaging records

| Imaging region strings                                                                    | X-ray strings                                                                                                                                                                                                                                                                                          | MRI strings                                                                                                                                                                                   | CT strings                                        | Ultrasound strings                                                                                                              |
|-------------------------------------------------------------------------------------------|--------------------------------------------------------------------------------------------------------------------------------------------------------------------------------------------------------------------------------------------------------------------------------------------------------|-----------------------------------------------------------------------------------------------------------------------------------------------------------------------------------------------|---------------------------------------------------|---------------------------------------------------------------------------------------------------------------------------------|
| <b>Knee</b>                                                                               |                                                                                                                                                                                                                                                                                                        |                                                                                                                                                                                               |                                                   |                                                                                                                                 |
| KNEE<br>KN<br>BOTH K*<br><br><b>Exclude:</b><br>KNOW<br>KNIGHT                            | X-RAY KN<br>X-RAY RIGHT KN<br>X-RAY LEFT KN<br>XRAY KN<br>XRAY RIGHT KN<br>XRAY LEFT KN<br>XR KN<br>XR RIGHT KN<br>XR LEFT KN<br>PLAIN FILM KN<br>PLAIN FILM RIGHT KN<br>PLAIN FILM LEFT KN<br>RADIOGRAPH KN<br>RADIOGRAPH RIGHT KN<br>RADIOGRAPH LEFT KN<br>KNEE X<br>KNEE RADIOGR<br>KNEE PLAIN FILM | MRI KN<br>MRI RIGHT KN<br>MRI LEFT KN<br>MR KN<br>MR RIGHT KN<br>MR LEFT KN<br>MAGNETIC RESONANCE KN<br>MAGNETIC RESONANCE RIGHT KN<br>MAGNETIC RESONANCE LEFT KN<br>KNEE MR<br>KNEE MAGNETIC | CT KN<br>CT RIGHT KN<br>CT LEFT KN<br>KNEE CT     | US KN<br>US RIGHT KN<br>US LEFT KN<br>ULTRASOUND KN<br>ULTRASOUND RIGHT KN<br>ULTRASOUND LEFT KN<br>KNEE US<br>KNEE ULT         |
| <b>Shoulder</b>                                                                           |                                                                                                                                                                                                                                                                                                        |                                                                                                                                                                                               |                                                   |                                                                                                                                 |
| SHOULDER<br>SH<br>CLAVICLE*<br><br><b>Exclude:</b><br>SHBG<br>TSH<br>SHEET<br>FSH<br>GSHS | X-RAY SH<br>X-RAY RIGHT SH<br>X-RAY LEFT SH<br>XRAY SH<br>XRAY RIGHT SH<br>XRAY LEFT SH<br>XR SH<br>XR RIGHT SH<br>XR LEFT SH<br>PLAIN FILM SH                                                                                                                                                         | MRI SH<br>MRI RIGHT SH<br>MRI LEFT SH<br>MR SH<br>MR RIGHT SH<br>MR LEFT SH<br>MAGNETIC RESONANCE SH<br>MAGNETIC RESONANCE RIGHT SH<br>MAGNETIC RESONANCE LEFT SH<br>SHOULDER MR              | CT SH<br>CT RIGHT SH<br>CT LEFT SH<br>SHOULDER CT | US SH<br>US RIGHT SH<br>US LEFT SH<br>ULTRASOUND SH<br>ULTRASOUND RIGHT SH<br>ULTRASOUND LEFT SH<br>SHOULDER US<br>SHOULDER ULT |

|                                                                                         |                                                                                                                                                                                                                                                                                      |                                                                              |                                                  |                                                                                                                        |
|-----------------------------------------------------------------------------------------|--------------------------------------------------------------------------------------------------------------------------------------------------------------------------------------------------------------------------------------------------------------------------------------|------------------------------------------------------------------------------|--------------------------------------------------|------------------------------------------------------------------------------------------------------------------------|
| PSH<br>SH/                                                                              | PLAIN FILM RIGHT SH<br>PLAIN FILM LEFT SH<br>RADIOGRAPH SH<br>RADIOGRAPH RIGHT SH<br>RADIOGRAPH LEFT SH<br>SHOULDER X<br>SHOULDER RADIOGR<br>SHOULDER PLAIN FILM                                                                                                                     | SHOULDER MAGNETIC                                                            |                                                  |                                                                                                                        |
| <b>Neck</b>                                                                             |                                                                                                                                                                                                                                                                                      |                                                                              |                                                  |                                                                                                                        |
| NECK<br>NEC<br>CERVIC<br>C1<br>C2<br>C3<br>C4<br>C5<br>C6<br>C7<br>C SPINE<br>SPINE CX* | X-RAY NECK<br>XRAY NECK<br>XR NECK<br>X-RAY CERVICAL<br>XRAY CERVICAL<br>XR CERVICAL<br>PLAIN FILM NECK<br>PLAIN FILM CERVICAL<br>RADIOGRAPH NECK<br>RADIOGRAPH CERVICAL<br>NECK X<br>CERVICAL X<br>NECK PLAIN FILM<br>CERVICAL PLAIN FILM<br>NECK RADIOGRAPH<br>CERVICAL RADIOGRAPH | MRI NECK<br>MR NECK<br>MRI CERVICAL<br>MR CERVICAL<br>NECK MR<br>CERVICAL MR | CT NECK<br>CT CERVICAL<br>NECK CT<br>CERVICAL CT | US NECK<br>US CERVICAL<br>ULTRASOUND NECK<br>ULTRASOUND CERVICAL<br>NECK US<br>CERVICAL US<br>NECK ULT<br>CERVICAL ULT |
| <b>Low back</b>                                                                         |                                                                                                                                                                                                                                                                                      |                                                                              |                                                  |                                                                                                                        |
| LUMB<br>SACR<br>L1<br>L2<br>L3<br>L4<br>L5                                              | X-RAY LUMB<br>XRAY LUMB<br>XR LUMB<br>X-RAY SACR<br>XRAY SACR<br>XR SACR<br>PLAIN FILM LUMB                                                                                                                                                                                          | MRI LUMB<br>MR LUMB<br>MRI SACR<br>MR SACR<br>LUMBAR MR<br>SACRAL MR         | CT LUMB<br>CT SACR<br>LUMBAR CT<br>SACRAL CT     | US LUMB<br>ULTRASOUND LUMB<br>US SACR<br>ULTRASOUND SACR<br>LUMBAR US<br>LUMBAR ULT<br>SACRAL US                       |

|                                              |                                                                                                                                                                   |  |  |            |
|----------------------------------------------|-------------------------------------------------------------------------------------------------------------------------------------------------------------------|--|--|------------|
| LOWER BACK<br><br><b>Exclude:</b><br>FUNGAL2 | PLAIN FILM SACR<br>RADIOGRAPH LUMB<br>RADIOGRAPH SACR<br>LUMBAR X<br>LUMBAR RADIOGRAPH<br>LUMBAR PLAIN FILM<br>SACRAL X<br>SACRAL RADIOGRAPH<br>SACRAL PLAIN FILM |  |  | SACRAL ULT |
|----------------------------------------------|-------------------------------------------------------------------------------------------------------------------------------------------------------------------|--|--|------------|

\*String match term added after initial coding
